**S1 Dataset. Alignment of Lost City MutY homologs.**

Chemical motifs are highlighted in columns. Alignment was generated by *Promals3D* [88], guided by the structure of *Gs* MutY. It was necessary to align sequences in the first block including up to N146 separately from the second block and third block because otherwise the C-terminal domain residues were aligned inconsistently. The homologs flagged with dark red highlighting were eliminated because of missing chemical motifs. The homolog flagged with light pink highlighting required manual adjustment so as to align the H-x-FSH motif.

The representative LCHF MutYs have the following contig ids: *Marinosulfonomonas* MutY, c\_000001803648; *Rhodobacteraceae* MutY, c\_000002747260; *Thiotrichaceae* MutY, c\_000000598175; *Flavobacteriaceae* MutY, c\_000001535696.

conservation: 9 5 57 67999 5 5 65 7 55 6 9 98989 9 5 8 65969 67 66 5 859

sp P17802 MUTY ECOL 28 KTPYKVVWSVLMQITQVATVTP-YFFERMARFPTVTLDAALPDEVLHWLTGVLGYARARNLHAAQQAVALTHGKGFTPEEFEEAALPGVGRGTAGAGLSLSLGHFPFLIG 1400

sp P83847 MUTY GEOS 37 RDPYKVVWSVLMQITRVEVTTP-YFEQIFDRFPTLEALAADEDEVLKAWEGVLGYSRVNRNLHAAVEKVTYRKGKGVDPDDPGLGKLPGLGVTAGVALLSLAYGFPFPAVIG 146

0.000003652391 2 37 PDPYKVVWSVLMQITAAVAVTP-YFFRRFTTQVLAALAAADGVDMGAWAGLGYARARNLHAAKVCVCTHAGAFITPTVYAGLIALPGIGFTAGVALLSIADFAREVAVVIG 149

0.000000031207 6 26 EDPYALIVWSVLMQITRTVTTP-VYHFLFKRFPDKSLARLQGVLEWAGLGYSRGRNLHAAQVTVLNDHGGIFPTFDELKLGKLPGLGFTAAALCSIAYGEPFLAVIG 138

0.00000430975 4 38 PNHYVWSVLMQITQVATVTP-YLNNFLHWKPTLNDLATAQTNVQLQAWAGLGYARARNLHAAQCAVMEKYGFTFPFKTEKLEKLPGLGHGTAAALVAIHAQGSVAVIG 150

0.00001007148 4 35 RDPYVWVWSVLMQITTAATVTP-YLDRFLKRPFTVEALSAGAEVLNVEWGLGYSRARNLSHAKGLVEWEGQWRNTATEITQSLPGVGTAGVALLSIADFAREVAVVIG 147

0.00001092848 3 48 PDPYRVWSVLMQITTVGAVTP-CECFERLFRFPTVEALARDLVEKMAWAGLGYSRARNLHAAQAEVAHRHGGVPTFDEAGLKGALPGIGDTAAALVAIHAQGRRAAVVIG 160

0.00001151029 1 1 -----WISVLMQITQVATVTP-YYSNLFHKGPTLADLAMAHTHRAVQLQAWAGLGYARARNLHAAQCAVMEKYGFTFPFKTEKLEKLPGLGHGTAAALVAIHAQGSVAVIG 167

0.00001179282 1 58 PDPYVWSVLMQITTTAAVTP-YFFRFTTRFPDIFALAAPEHVAWSAWAGLGYSRARNLHAAQCAVMAAGRFFPTFDEAGLKGALPGIGDTAAALVAIHAQGRRAAVVIG 169

0.00001180648 25 40 RDPYKVVWSVLMQITTAATAVTP-YPHAFITRFPPTLILALASANDDDVMGAWAGLGYARARNLHAAQCAVMAAGRFFPTFDEAGLKGALPGIGDTAAALVAIHAQGRRAAVVIG 152

0.00001206161 4 28 EDPYKVVWSVLMQITTVAVTP-YFNSWKLEFPTVSGVAGARLSDLSWAGLGYARARNLHAAQCAVMAAGRFFPTFDEAGLKGALPGIGDTAAALVAIHAQGRRAAVVIG 150

0.00003607531 2 36 KPYKVVWSVLMQITQVTVTP-YFQHLKCTVPTIDELANASLDDVLKAWGVLGYSRARNLHAAKLCINDFGRFPNTFTEQLEQLPGIGGTAAALVAIHAQGRRAAVVIG 148

0.00003872363 4 36 PDPYVWSVLMQITTTAAVTP-YFNTFTKRWNPALATAQADDAWAEWAGLGYARARNLHAAQCAVMAAGRFFPTFDEAGLKGALPGIGDTAAALVAIHAQGRRAAVVIG 148

0.00004820107 4 34 PNFYVWSVLMQITQVTVTP-YFTFKVERWAPHDHSHADRDVHEWAGLGYARARNLHAAQCAVMAAGRFFPTFDEAGLKGALPGIGDTAAALVAIHAQGRRAAVVIG 155

0.00005774797 1 29 PNHYVWSVLMQITTTVATVTP-YFNTFKVERWAPHDHSHADRDVHEWAGLGYARARNLHAAQCAVMAAGRFFPTFDEAGLKGALPGIGDTAAALVAIHAQGRRAAVVIG 155

0.00005867021 3 40 PDPYRVWSVLMQITTTAAVTP-YFNTFKRWNPALATAQADDAWAEWAGLGYARARNLHAAQCAVMAAGRFFPTFDEAGLKGALPGIGDTAAALVAIHAQGRRAAVVIG 152

0.00004546210 3 31 PSKYKTVWSVLMQITQVNTVTP-YFHRMFERPTTEALANASDEVLKAWGVLGYARARNLHAAQCAVMAAGRFFPTFDEAGLKGALPGIGDTAAALVAIHAQGRRAAVVIG 143

0.00004551008 5 34 PSKYKTVWSVLMQITQVATVTP-YFQIFQRPFTVEALSILDLKAWGVLGYARARNLHAAQCAVMAAGRFFPTFDEAGLKGALPGIGDTAAALVAIHAQGRRAAVVIG 152

0.00002511148 4 26 KPYRVWWSVLMQITQVSTAIP-YEFKIFIEIDPVKLSLSDLDVLKAWGVLGYARARNLHAAQCAVMAAGRFFPTFDEAGLKGALPGIGDTAAALVAIHAQGRRAAVVIG 138

0.00000577378 2 14 KPYRVWWSVLMQITQVSTVTP-YFQKFIIEIDPVKLSLSDLDVLKAWGVLGYARARNLHAAQCAVMAAGRFFPTFDEAGLKGALPGIGDTAAALVAIHAQGRRAAVVIG 126

0.00000598175 3 37 INPYRVWWSVLMQITQVSTVTP-YFQKFIIEIDPVKLSLSDLDVLKAWGVLGYARARNLHAAQCAVMAAGRFFPTFDEAGLKGALPGIGDTAAALVAIHAQGRRAAVVIG 149

0.00000754627 3 34 KPYRVWWSVLMQITQVSTVTP-YFQKFIIEIDPVKLSLSDLDVLKAWGVLGYARARNLHAAQCAVMAAGRFFPTFDEAGLKGALPGIGDTAAALVAIHAQGRRAAVVIG 146

0.0000111118 1 25 RDPYVWSVLMQITQVSTVTP-YFQKFIIEIDPVKLSLSDLDVLKAWGVLGYARARNLHAAQCAVMAAGRFFPTFDEAGLKGALPGIGDTAAALVAIHAQGRRAAVVIG 137

0.00000807619 3 28 PDPYVWSVLMQITQVSTVTP-YFQKFIIEIDPVKLSLSDLDVLKAWGVLGYARARNLHAAQCAVMAAGRFFPTFDEAGLKGALPGIGDTAAALVAIHAQGRRAAVVIG 140

0.00001176522 24 50 RPYRVWWSVLMQITQVSTVTP-YFERMEAFPAVDLADAMDAVLSWAGLGYARARNLHAAQCAVMAAGRFFPTFDEAGLKGALPGIGDTAAALVAIHAQGRRAAVVIG 141

0.00001345122 1 4 ISPYRVWWSVLMQITQVSTVTP-YQYRMKSPSTEQIATASQDEVLHAWGVLGYARARNLHAAQCAVMAAGRFFPTFDEAGLKGALPGIGDTAAALVAIHAQGRRAAVVIG 116

0.00001515736 6 18 RDPYRVWSVLMQITQVSTVTP-YQYRMKSPSTEQIATASQDEVLHAWGVLGYARARNLHAAQCAVMAAGRFFPTFDEAGLKGALPGIGDTAAALVAIHAQGRRAAVVIG 116

0.00001682161 2 25 PTPYRVWSVLMQITQVSTVTP-YQYRMKSPSTEQIATASQDEVLHAWGVLGYARARNLHAAQCAVMAAGRFFPTFDEAGLKGALPGIGDTAAALVAIHAQGRRAAVVIG 137

0.00001923643 29 28 RDPYRVWSVLMQITQVSTVTP-YQYRMKSPSTEQIATASQDEVLHAWGVLGYARARNLHAAQCAVMAAGRFFPTFDEAGLKGALPGIGDTAAALVAIHAQGRRAAVVIG 137

0.00002030994 5 26 INPYRVWSVLMQITQVSTVTP-YFQKFIIEIDPVKLSLSDLDVLKAWGVLGYARARNLHAAQCAVMAAGRFFPTFDEAGLKGALPGIGDTAAALVAIHAQGRRAAVVIG 138

0.00002038721 4 40 KSPYHIVWSVLMQITQVATVTP-YFHKIFNSFPKLSLAKSDLDVLKAWGVLGYARARNLHAAQCAVMAAGRFFPTFDEAGLKGALPGIGDTAAALVAIHAQGRRAAVVIG 143

0.00002523527 15 43 RDPYRVWSVLMQITQVAAVTP-YFQYFVAALPTAALAAASDEVLHAWGVLGYARARNLHAAQCAVMAAGRFFPTFDEAGLKGALPGIGDTAAALVAIHAQGRRAAVVIG 155

0.00002608510 2 26 INPYRVWSVLMQITQVATVTP-YFQKFIIEIDPVKLSLSDLDVLKAWGVLGYARARNLHAAQCAVMAAGRFFPTFDEAGLKGALPGIGDTAAALVAIHAQGRRAAVVIG 143

0.00002961512 2 29 KPYSTVWSVLMQITQVSTVTP-YFERWIKITFTGLKLANAPQKILKAWGVLGYARARNLHAAQCAVMAAGRFFPTFDEAGLKGALPGIGDTAAALVAIHAQGRRAAVVIG 141

0.00002979152 3 34 RPYRVWWSVLMQITQVSTVTP-YFERWIKITFTGLKLANAPQKILKAWGVLGYARARNLHAAQCAVMAAGRFFPTFDEAGLKGALPGIGDTAAALVAIHAQGRRAAVVIG 146

0.00003249034 1 46 KSPYHIVWSVLMQITQVSTVTP-YFERWIKITFTGLKLANAPQKILKAWGVLGYARARNLHAAQCAVMAAGRFFPTFDEAGLKGALPGIGDTAAALVAIHAQGRRAAVVIG 148

0.00003306769 3 46 KPYSTVWSVLMQITQVSTVTP-YFERWIKITFTGLKLANAPQKILKAWGVLGYARARNLHAAQCAVMAAGRFFPTFDEAGLKGALPGIGDTAAALVAIHAQGRRAAVVIG 148

0.00003333239 3 28 PDPYVWSVLMQITQVSTVTP-YFERWIKITFTGLKLANAPQKILKAWGVLGYARARNLHAAQCAVMAAGRFFPTFDEAGLKGALPGIGDTAAALVAIHAQGRRAAVVIG 140

0.00003403697 5 28 RPYRVWWSVLMQITQVSTVTP-YFERWIKITFTGLKLANAPQKILKAWGVLGYARARNLHAAQCAVMAAGRFFPTFDEAGLKGALPGIGDTAAALVAIHAQGRRAAVVIG 141

0.00003499295 4 25 DDPHYIVWSVLMQITQVSTVTP-YFERWIKITFTGLKLANAPQKILKAWGVLGYARARNLHAAQCAVMAAGRFFPTFDEAGLKGALPGIGDTAAALVAIHAQGRRAAVVIG 133

0.00003766664 5 41 PTPYRVWSVLMQITQVSTVTP-YQYRMKSPSTEQIATASQDEVLHAWGVLGYARARNLHAAQCAVMAAGRFFPTFDEAGLKGALPGIGDTAAALVAIHAQGRRAAVVIG 153

0.00003948186 2 28 ITPYRVWSVLMQITQVATVTP-YFERQVTFPTDVKGLAARLDEVLHAWGVLGYARARNLHAAQCAVMAAGRFFPTFDEAGLKGALPGIGDTAAALVAIHAQGRRAAVVIG 139

0.00005057120 4 28 ITPYRVWSVLMQITQVATVTP-YFQYQIFDPTDVKGLAARLDEVLHAWGVLGYARARNLHAAQCAVMAAGRFFPTFDEAGLKGALPGIGDTAAALVAIHAQGRRAAVVIG 139

0.00005590109 5 28 ISPYRVWSVLMQITQVSTVTP-YFHKIFNSFPKLSLAKSDLDVLKAWGVLGYARARNLHAAQCAVMAAGRFFPTFDEAGLKGALPGIGDTAAALVAIHAQGRRAAVV

c 000004582258 1 6 SDPKYKILWSLIMLQQTQVETVIP-YQKWINHYPTIKSVALENDILNKIWEGLGYISRCNHFHEAKIDIFYNHNGVLPKQIEDFKSLKGVGILISGAVMSIAFNQTHIAVGL 118  
c 000005254087 1 32 RDPYAVWVWIMLQQTQVETVIP-YERWLAFFFTVQALAAEASDEVILKWEGLGYISRAARLHAAQVMVMEYDGRIPPTAADLLKLGIGRGTANAIASIAFNQTHIAVGL 144  
c 000005603677 1 20 QDPYKILWIASIMLQQTQVETVIP-YERFIAAFTPSIEKIAEETAEKELMKLWGLGYISRAARLHAAQVMVMEYDGRIPPTAADLLKLGIGRGTANAIASIAFNQTHIAVGL 141  
c 000003283462 3 17 TGDFYRILWIASIMLQQTQVETVIP-YFTKWLKRFPTSLVSAANAEKELMKLWGLGYISRAARLHAAQVMVMEYDGRIPPTAADLLKLGIGRGTANAIASIAFNQTHIAVGL 129  
c 000002687221 1 31 SNDFYILWIASIMLQQTQVETVIP-YQHWISALPDIHLSVAEAPIDNLIKWEGLGYISRAARLHAAQVMVMEYDGRIPPTAADLLKLGIGRGTANAIASIAFNQTHIAVGL 143  
c 000003347358 19 57 DEAYKILWIASIMLQQTQVETVIP-YFTKWLKRFPTSLVSAANAEKELMKLWGLGYISRAARLHAAQVMVMEYDGRIPPTAADLLKLGIGRGTANAIASIAFNQTHIAVGL 165  
c 000002701031 2 24 SDSYKILWIASIMLQQTQVETVIP-YFTKWLKRFPTSLVSAANAEKELMKLWGLGYISRAARLHAAQVMVMEYDGRIPPTAADLLKLGIGRGTANAIASIAFNQTHIAVGL 136  
c 000000582753 3 32 KSSYKILWIASIMLQQTQVETVIP-YFTKWLKRFPTSLVSAANAEKELMKLWGLGYISRAARLHAAQVMVMEYDGRIPPTAADLLKLGIGRGTANAIASIAFNQTHIAVGL 144  
c 00000173769 5 24 NDPSYKILWIASIMLQQTQVETVIP-YFTKWLKRFPTSLVSAANAEKELMKLWGLGYISRAARLHAAQVMVMEYDGRIPPTAADLLKLGIGRGTANAIASIAFNQTHIAVGL 136  
c 000004369364 1 27 SDYKILWIASIMLQQTQVETVIP-YFTKWLKRFPTSLVSAANAEKELMKLWGLGYISRAARLHAAQVMVMEYDGRIPPTAADLLKLGIGRGTANAIASIAFNQTHIAVGL 139  
c 000006057486 30 28 KDPLYLWIASIMLQQTQVETVIP-YFTKWLKRFPTSLVSAANAEKELMKLWGLGYISRAARLHAAQVMVMEYDGRIPPTAADLLKLGIGRGTANAIASIAFNQTHIAVGL 140  
c 000005494072 10 24 KDPLYLWIASIMLQQTQVETVIP-YFTKWLKRFPTSLVSAANAEKELMKLWGLGYISRAARLHAAQVMVMEYDGRIPPTAADLLKLGIGRGTANAIASIAFNQTHIAVGL 136  
c 000001742634 3 27 KKPPLYLWIASIMLQQTQVETVIP-YFTKWLKRFPTSLVSAANAEKELMKLWGLGYISRAARLHAAQVMVMEYDGRIPPTAADLLKLGIGRGTANAIASIAFNQTHIAVGL 139  
c 000002826998 2 27 KNPPLYLWIASIMLQQTQVETVIP-YFTKWLKRFPTSLVSAANAEKELMKLWGLGYISRAARLHAAQVMVMEYDGRIPPTAADLLKLGIGRGTANAIASIAFNQTHIAVGL 139  
c 000003159439 6 24 SNPLYLWIASIMLQQTQVETVIP-YFTKWLKRFPTSLVSAANAEKELMKLWGLGYISRAARLHAAQVMVMEYDGRIPPTAADLLKLGIGRGTANAIASIAFNQTHIAVGL 136  
c 000004487214 1 29 RNPPLYLWIASIMLQQTQVETVIP-YFTKWLKRFPTSLVSAANAEKELMKLWGLGYISRAARLHAAQVMVMEYDGRIPPTAADLLKLGIGRGTANAIASIAFNQTHIAVGL 141  
c 000005037037 2 27 KNPPLYLWIASIMLQQTQVETVIP-YFTKWLKRFPTSLVSAANAEKELMKLWGLGYISRAARLHAAQVMVMEYDGRIPPTAADLLKLGIGRGTANAIASIAFNQTHIAVGL 139  
c 000001599964 1 19 YPPLYLWIASIMLQQTQVETVIP-YFTKWLKRFPTSLVSAANAEKELMKLWGLGYISRAARLHAAQVMVMEYDGRIPPTAADLLKLGIGRGTANAIASIAFNQTHIAVGL 131  
c 000002498472 1 28 YSPPLYLWIASIMLQQTQVETVIP-YFTKWLKRFPTSLVSAANAEKELMKLWGLGYISRAARLHAAQVMVMEYDGRIPPTAADLLKLGIGRGTANAIASIAFNQTHIAVGL 140  
c 00000415912 3 17 KNPPLYLWIASIMLQQTQVETVIP-YFTKWLKRFPTSLVSAANAEKELMKLWGLGYISRAARLHAAQVMVMEYDGRIPPTAADLLKLGIGRGTANAIASIAFNQTHIAVGL 131  
c 000004766858 2 30 YHPPLYLWIASIMLQQTQVETVIP-YFTKWLKRFPTSLVSAANAEKELMKLWGLGYISRAARLHAAQVMVMEYDGRIPPTAADLLKLGIGRGTANAIASIAFNQTHIAVGL 142  
c 000002747260 18 36 PDAYAVWVWIMLQQTQVETVIP-YFRFTTTRWFTVADIAAEDADVMEWAGLGYISRAARLHAAQVMVMEYDGRIPPTAADLLKLGIGRGTANAIASIAFNQTHIAVGL 148  
c 000005371561 38 36 PDYKILWIASIMLQQTQVETVIP-YFRFTTTRWFTVADIAAEDADVMEWAGLGYISRAARLHAAQVMVMEYDGRIPPTAADLLKLGIGRGTANAIASIAFNQTHIAVGL 148  
c 000000169465 2 32 VTPYKILWIASIMLQQTQVETVIP-YFRFTTTRWFTVADIAAEDADVMEWAGLGYISRAARLHAAQVMVMEYDGRIPPTAADLLKLGIGRGTANAIASIAFNQTHIAVGL 144  
c 000003254110 11 32 VTPYKILWIASIMLQQTQVETVIP-YFRFTTTRWFTVADIAAEDADVMEWAGLGYISRAARLHAAQVMVMEYDGRIPPTAADLLKLGIGRGTANAIASIAFNQTHIAVGL 144  
c 000004750284 20 32 VTPYKILWIASIMLQQTQVETVIP-YFRFTTTRWFTVADIAAEDADVMEWAGLGYISRAARLHAAQVMVMEYDGRIPPTAADLLKLGIGRGTANAIASIAFNQTHIAVGL 144  
c 000000141782 15 37 APYKILWIASIMLQQTQVETVIP-YFRFTTTRWFTVADIAAEDADVMEWAGLGYISRAARLHAAQVMVMEYDGRIPPTAADLLKLGIGRGTANAIASIAFNQTHIAVGL 149  
c 000002717847 9 31 ITPYKILWIASIMLQQTQVETVIP-YFRFTTTRWFTVADIAAEDADVMEWAGLGYISRAARLHAAQVMVMEYDGRIPPTAADLLKLGIGRGTANAIASIAFNQTHIAVGL 143  
c 000004054739 1 18 ISPYKILWIASIMLQQTQVETVIP-YFRFTTTRWFTVADIAAEDADVMEWAGLGYISRAARLHAAQVMVMEYDGRIPPTAADLLKLGIGRGTANAIASIAFNQTHIAVGL 130  
c 000006126673 1 43 PNPLYLWIASIMLQQTQVETVIP-YFTKWLKRFPTSLVSAANAEKELMKLWGLGYISRAARLHAAQVMVMEYDGRIPPTAADLLKLGIGRGTANAIASIAFNQTHIAVGL 155  
c 000000339186 3 1 -DPSYKILWIASIMLQQTQVETVIP-YFRFTTTRWFTVADIAAEDADVMEWAGLGYISRAARLHAAQVMVMEYDGRIPPTAADLLKLGIGRGTANAIASIAFNQTHIAVGL 112  
c 000003029168 2 32 RDPYAVWVWIMLQQTQVETVIP-YERWLAFFFTVQALAAEASDEVILKWEGLGYISRAARLHAAQVMVMEYDGRIPPTAADLLKLGIGRGTANAIASIAFNQTHIAVGL 144  
c 000001863436 1 48 GDPLYLWIASIMLQQTQVETVIP-YFTKWLKRFPTSLVSAANAEKELMKLWGLGYISRAARLHAAQVMVMEYDGRIPPTAADLLKLGIGRGTANAIASIAFNQTHIAVGL 160  
c 000002830137 4 41 RDPYAVWVWIMLQQTQVETVIP-YERWLAFFFTVQALAAEASDEVILKWEGLGYISRAARLHAAQVMVMEYDGRIPPTAADLLKLGIGRGTANAIASIAFNQTHIAVGL 153  
c 000004123202 3 35 RDPYAVWVWIMLQQTQVETVIP-YERWLAFFFTVQALAAEASDEVILKWEGLGYISRAARLHAAQVMVMEYDGRIPPTAADLLKLGIGRGTANAIASIAFNQTHIAVGL 147  
c 000001933926 1 21 DPLYLWIASIMLQQTQVETVIP-YFTKWLKRFPTSLVSAANAEKELMKLWGLGYISRAARLHAAQVMVMEYDGRIPPTAADLLKLGIGRGTANAIASIAFNQTHIAVGL 133  
c 000003136334 1 33 MDPLYLWIASIMLQQTQVETVIP-YFTKWLKRFPTSLVSAANAEKELMKLWGLGYISRAARLHAAQVMVMEYDGRIPPTAADLLKLGIGRGTANAIASIAFNQTHIAVGL 145  
c 000005849454 9 30 RDPYAVWVWIMLQQTQVETVIP-YERWLAFFFTVQALAAEASDEVILKWEGLGYISRAARLHAAQVMVMEYDGRIPPTAADLLKLGIGRGTANAIASIAFNQTHIAVGL 142  
c 000001169194 1 41 TDPLYLWIASIMLQQTQVETVIP-YFTKWLKRFPTSLVSAANAEKELMKLWGLGYISRAARLHAAQVMVMEYDGRIPPTAADLLKLGIGRGTANAIASIAFNQTHIAVGL 153  
c 000002786947 2 41 TDPLYLWIASIMLQQTQVETVIP-YFTKWLKRFPTSLVSAANAEKELMKLWGLGYISRAARLHAAQVMVMEYDGRIPPTAADLLKLGIGRGTANAIASIAFNQTHIAVGL 153  
c 00000279808 52 28 RSPYKILWIASIMLQQTQVETVIP-YFTKWLKRFPTSLVSAANAEKELMKLWGLGYISRAARLHAAQVMVMEYDGRIPPTAADLLKLGIGRGTANAIASIAFNQTHIAVGL 141  
c 000000358065 2 31 QKQYKILWIASIMLQQTQVETVIP-YFTKWLKRFPTSLVSAANAEKELMKLWGLGYISRAARLHAAQVMVMEYDGRIPPTAADLLKLGIGRGTANAIASIAFNQTHIAVGL 143  
c 000003745941 1 22 AALPYKILWIASIMLQQTQVETVIP-YFTKWLKRFPTSLVSAANAEKELMKLWGLGYISRAARLHAAQVMVMEYDGRIPPTAADLLKLGIGRGTANAIASIAFNQTHIAVGL 132  
c 000004187032 4 31 KHYKILWIASIMLQQTQVETVIP-YFTKWLKRFPTSLVSAANAEKELMKLWGLGYISRAARLHAAQVMVMEYDGRIPPTAADLLKLGIGRGTANAIASIAFNQTHIAVGL 143  
c 000006067315 3 31 QHYKILWIASIMLQQTQVETVIP-YFTKWLKRFPTSLVSAANAEKELMKLWGLGYISRAARLHAAQVMVMEYDGRIPPTAADLLKLGIGRGTANAIASIAFNQTHIAVGL 143  
c 000005543774 1 1 KHYKILWIASIMLQQTQVETVIP-YFTKWLKRFPTSLVSAANAEKELMKLWGLGYISRAARLHAAQVMVMEYDGRIPPTAADLLKLGIGRGTANAIASIAFNQTHIAVGL 135  
c 000006211484 1 23 KQYKILWIASIMLQQTQVETVIP-YFTKWLKRFPTSLVSAANAEKELMKLWGLGYISRAARLHAAQVMVMEYDGRIPPTAADLLKLGIGRGTANAIASIAFNQTHIAVGL 145  
c 000002718976 3 32 KELYKILWIASIMLQQTQVETVIP-YFTKWLKRFPTSLVSAANAEKELMKLWGLGYISRAARLHAAQVMVMEYDGRIPPTAADLLKLGIGRGTANAIASIAFNQTHIAVGL 144  
c 000002992548 1 33 KELYKILWIASIMLQQTQVETVIP-YFTKWLKRFPTSLVSAANAEKELMKLWGLGYISRAARLHAAQVMVMEYDGRIPPTAADLLKLGIGRGTANAIASIAFNQTHIAVGL 145  
c 000004456751 1 1 ---YVLYKILWIASIMLQQTQVETVIP-YFTKWLKRFPTSLVSAANAEKELMKLWGLGYISRAARLHAAQVMVMEYDGRIPPTAADLLKLGIGRGTANAIASIAFNQTHIAVGL 109  
c 000002655634 1 28 KELYKILWIASIMLQQTQVETVIP-YFTKWLKRFPTSLVSAANAEKELMKLWGLGYISRAARLHAAQVMVMEYDGRIPPTAADLLKLGIGRGTANAIASIAFNQTHIAVGL 140  
c 000004234203 2 28 NDPLYKILWIASIMLQQTQVETVIP-YFTKWLKRFPTSLVSAANAEKELMKLWGLGYISRAARLHAAQVMVMEYDGRIPPTAADLLKLGIGRGTANAIASIAFNQTHIAVGL 139  
6u7b.before.V147.pdb 28 RDPYKILWIASIMLQQTQVETVIP-YFTKWLKRFPTSLVSAANAEKELMKLWGLGYISRAARLHAAQVMVMEYDGRIPPTAADLLKLGIGRGTANAIASIAFNQTHIAVGL 140  
Consensus\_aa: .ss.Y.l1EISEIMLQQTv.hhhs.Y8.p8hplpPaIsLA.tbppllphWGLGYsRt.Nlhptp.1.pph.t.hPshp.1.LPGIG..TAtAlhthtsp..shldtN

Conservation: 95 9 75 87 85 9 5 9 8 9 5  
sp\_P17802\_MUTY\_ECOL 141 VKRVLRYAVSGWPG---KKEVENKLSL---SEQ-VTP-----AVGVERFNMAMDLGAMICTRSKPKCS---LCPQNGCILAANNWSWALYVGRKKPK--- 225  
sp\_P38447\_MUTY\_GEOS 142 VMKRLSLFLVTDIDIA---KPSSTRKFEQI---VRS-IMA-----KRNPAFNAELIELGALVCTPRRPSCL---LCPQVQAYCAAFAGVAELVPKMK--- 231  
c 000003652391 2 150 VERMARMLFDISTPLP---GAKPALKAQ---AAS-LTP-----KPRGDYAAVMDLGATICTPRAPTCG---VCPIDNCAARRAGTAELPKRTPK--- 232  
c 000000031207 6 139 VERKLSYKIKIDGNPK---SGTARKRIQQA---ADD-ALD-----QENFGDHNALMDLGRSICTPKSPDQ---RCPPLASGAGARASGETPRWTRPKRQ--- 223  
c 000000430975 4 151 VERVSRIFPTQPIPLP---LSRPTLRQLA---AAG-LTP-----SKRPGDYAAVMDLGSIVCTPKSPKCM---VCPIDCLANISCTPRPKTP--- 222  
c 000001007148 4 148 TARYFARLIALRSIDLH---SGEGKQKMSL---AER-LTP-----KPRGDYAAVMDLGSIVCTPKSPKCM---VCPIDCLANISCTPRPKTP--- 231  
c 000001092848 3 161 VERVITRLRAIGTPLP---AAKPOVRKA---VAA-LTP-----AERPGDYAAVMDLGATICTPRRPSCL---LCPQVQAYCAAFAGVAELVPKMK--- 243  
c 000001151029 1 108 VERVSRIFPTQPIPLP---LSRPTLRQLA---AAG-LTP-----SKRPGDYAAVMDLGSIVCTPRNPKCN---VCPIDCLANISCTPRPKTP--- 190  
c 000001797282 1 170 VERVLSRAYAEAPLIP---GSRPEIRLL---TQA-LTP-----PDRPGDYAAVMDLGATICTPRKPCA---LCPWMRRCARSLRGTAQSPRKTIP--- 252  
c 000001803648 25 153 IERVMARMDIHSLPL---SAKPELLAC---AAS-LTP-----DPRGDYAAVMDLGATICTPKSASCG---VCPWFSFALRINGTAQVSLPKTKTP--- 235  
c 000002078955 4 153 VERMARMLRHHTPLP---AAKPELFSE---ATA-LTP-----DLRAGDYAAVMDLGATICTPKSPKTCG---VCPWFSFALRINGTAQVSLPKTKTP--- 235  
c 000002106160 4 141 VNRMARMLRLRLRFTTP---YNNKRVLSL---LIR-WLD-----LRPGDYAAVMDLGSIVCTPKSPKCM---VCPIDCLANISCTPRPKTP--- 222  
c 000003360753 1 2 151 VERVITRVFGIFKPLP---EAPRIIKDCAAK---LAT-KTP-----RGRPGDYAAVMDLGATICTPRKPKLCLD---LCPWERYKILANQNFVDVPRKAPK--- 236  
c 000003872363 4 149 VERMARMLFNVTPLP---AAKPELTAH---AAA-LTP-----VDRAGDYAAVMDLGATICTPKSPGCG---ICPCTEYALPEGDAANLPLRPK--- 231  
c 000004820107 1 156 IERIMARLYAITEPLP---DSKANLNLAA---GLS-EER-----KDRPGDYAAVMDLGATICTPKSPKCS---LCPVNDSCITAKRQGTAEISLPIKIKQ--- 222  
c 000005774797 1 140 VERVITRVFGIFKPLP---EAPRIIKDCAAK---LAT-KTP-----RGRPGDYAAVMDLGATICTPKSPKCM---VCPIDCLANISCTPRPKTP--- 222  
c 000005867021 3 153 VERMARMLRHHTPLP---AAKPELTAH---AAA-LTP-----VDRAGDYAAVMDLGATICTPKSPGCG---ICPCTEYALPEGDAANLPLRPK--- 231  
c 000004546210 2 144 VKRVLRSFFGKMGWSG---ESKVSKEMLWL---SAK-SLP-----VDNFEIYTGIMDLGATVCLPKNPNCN---NCPINVKYSYLINQVLVDSKPKLA--- 228  
c 000004551008 5 144 VKRVLRSFFGKMGWSG---ESKVSKEMLWL---SAK-SLP-----VDNFEIYTGIMDLGATVCLPKNPNCN---NCPINVKYSYLINQVLVDSKPKLA--- 228  
c 000002511148 4 139 VKRVLRYAIEGKLEK---TSKKRKLWQV---SEG-LLP-----DNKIEVYTAIMDLGATVCTKSNFVCLN---LCPIDNCAARRAGTAELVPKMK--- 211  
c 000000577378 2 127 VKRVLRYAIEGKLEK---TSKKRKLWQV---SEG-LLP-----DNKIEVYTAIMDLGATVCTKSNFVCLN---LCPIDNCAARRAGTAELVPKMK--- 211  
c 000000598175 2 150 VKRVLTRVFGVMDGPG---KADVLKWLML---AEQ-TTP-----ASRNADYTAIMDLGATICTRSKPRCE---DCLPDKADLAFQGGNQTYPTPKSPK--- 234  
c 000000754627 3 137 VKRVLTRVFGVMDGPG---KADVLKWLML---AEQ-TTP-----ASRNADYTAIMDLGATICTRSKPRCE---DCLPDKADLAFQGGNQTYPTPKSPK--- 234  
c 000000811118 1 148 VKRVLTRVFGVMDGPG---KADVLKWLML---AEQ-TTP-----ASRNADYTAIMDLGATICTRSKPRCE---DCLPDKADLAFQGGNQTYPTPKSPK--- 234  
c 00000089687 2 144 VKRVLTRVFGVMDGPG---KADVLKWLML---AEQ-TTP-----ASRNADYTAIMDLGATICTRSKPRCE---DCLPDKADLAFQGGNQTYPTPKSPK--- 234  
c 000001176522 24 161 VKRVLTRVFGVMDGPG---KADVLKWLML---AEQ-TTP-----ASRNADYTAIMDLGATICTRSKPRCE---DCLPDKADLAFQGGNQTYPTPKSPK--- 234  
c 000001345122 1 117 VKRVLTRVFGVMDGPG---KADVLKWLML---AEQ-TTP-----ASRNADYTAIMDLGATICTRSKPRCE---DCLPDKADLAFQGGNQTYPTPKSPK--- 234  
c 000001515736 6 131 VKRVLTRVFLVADGDLA---QSRNKRQLWY---AQO-LCPT---NLHEAMPRTYTGIMDLGATVCTRSKPKCL---VCPIDNCAARRAGTAELVPKMK--- 219  
c 000001682161 6 138 VKRVLTRVFLVADGDLA---QSRNKRQLWY---AQO-LCPT---NLHEAMPRTYTGIMDLGATVCTRSKPKCL---VCPIDNCAARRAGTAELVPKMK--- 219  
c 000001923643 29 141 VKRVLTRVFLVADGDLA---QSRNKRQLWY---AQO-LCPT---NLHEAMPRTYTGIMDLGATVCTRSKPKCL---VCPIDNCAARRAGTAELVPKMK--- 219  
c 000002030994 5 139 VKRVLTRVFLVADGDLA---QSRNKRQLWY---AQO-LCPT---NLHEAMPRTYTGIMDLGATVCTRSKPKCL---VCPIDNCAARRAGTAELVPKMK--- 219  
c 000002038721 4 141 VKRVLTRVFLVADGDLA---QSRNKRQLWY---AQO-LCPT---NLHEAMPRTYTGIMDLGATVCTRSKPKCL---VCPIDNCAARRAGTAELVPKMK--- 219  
c 000002523527 15 156 VKRVLTRVFLVADGDLA---QSRNKRQLWY---AQO-LCPT---NLHEAMPRTYTGIMDLGATVCTRSKPKCL---VCPIDNCAARRAGTAELVPKMK--- 219  
c 000002608528 2 139 VKRVLTRVFLVADGDLA---QSRNKRQLWY---AQO-LCPT---NLHEAMPRTYTGIMDLGATVCTRSKPKCL---VCPIDNCAARRAGTAELVPKMK--- 219  
c 000002961510 2 142 VKRVLTRVFLVADGDLA---QSRNKRQLWY---AQO-LCPT---NLHEAMPRTYTGIMDLGATVCTRSKPKCL---VCPIDNCAARRAGTAELVPKMK--- 219  
c 000002979152 8 147 VKRVLTRVFLVADGDLA---QSRNKRQLWY---AQO-LCPT---NLHEAMPRTYTGIMDLGATVCTRSKPKCL---VCPIDNCAARRAGTAELVPKMK--- 219  
c 000003248034 1 159 VLKRLTRVFLVADGDLA---QSRNKRQLWY---AQO-LCPT---NLHEAMPRTYTGIMDLGATVCTRSKPKCL---VCPIDNCAARRAGTAELVPKMK--- 219  
c 000003294679 3 144 VRKVLTRVFLVADGDLA---QSRNKRQLWY---AQO-LCPT---NLHEAMPRTYTGIMDLGATVCTRSKPKCL---VCPIDNCAARRAGTAELVPKMK--- 219  
c 000003333364 1 141 VRKVLTRVFLVADGDLA---QSRNKRQLWY---AQO-LCPT---NLHEAMPRTYTGIMDLGATVCTRSKPKCL---VCPIDNCAARRAGTAELVPKMK--- 219  
c 00000340297 5 5 ISKIITVLMWPG---QTVTEV---ANE-LVS-----LSQSGYANNAMDLASSIRAGNPVE---GALGETYFSDAICRLFKPKRKKPEKKIK 219  
c 000003492925 4 134 ISKIITVLMWPG---QTVTEV---ANE-LVS-----LSQSGYANNAMDLASSIRAGNPVE---GALGETYFSDAICRLFKPKRKKPEKKIK 219  
c 000003766664 5 154 VIKVLSRLCLAEKLEP---SDKLRLRI---AYN-LVP-----KRNFDYTAIMDLGATICTRSKPKCL---VCPIDNCAARRAGTAELVPKMK--- 211  
c 000003948186 72 140 VIKVLSRLCLAEKLEP---SDKLRLRI---AYN-LVP-----KRNFDYTAIMDLGATICTRSKPKCL---VCPIDNCAARRAGTAELVPKMK--- 211  
c 000005057120 4 141 VKRVLTRYFALSGWTG---NSKISNELWKL---SSR-YTP-----KRVVYTAIMDLGATVCTRSKPKCL---VCPIDNCAARRAGTAELVPKMK--- 225  
c 000005590109 5 140 VKRVLTRYFALSGWTG---NSKISNELWKL---SSR-YTP-----KRVVYTAIMDLGATVCTRSKPKCL---VCPIDNCAARRAGTAELVPKMK--- 225  
c 000006063368 2 139 VKRVLTRYFALSGWTG---NSKISNELWKL---SSR-YTP-----KRVVYTAIMDLGATVCTRSKPKCL---VCPIDNCAARRAGTAELVPKMK--- 225  
c 000006467631 2 119 VKRVLTRYFALSGWTG---NSKISNELWKL---SSR-YTP-----KRVVYTAIMDLGATVCTRSKPKCL---VCPIDNCAARRAGTAELVPKMK--- 225  
c 00000788235 1 140 VKRVLTRYFALSGWTG---NSKISNELWKL---SSR-YTP-----KRVVYTAIMDLGATVCTRSKPKCL---VCPIDNCAARRAGTAELVPKMK--- 225  
c 00000817176 11 141 VKRVLTRYFALSGWTG---NSKISNELWKL---SSR-YTP-----KRVVYTAIMDLGATVCTRSKPKCL---VCPIDNCAARRAGTAELVPKMK--- 225  
c 000001660697 64 141 VKRVLTRYFALSGWTG---NSKISNELWKL---SSR-YTP-----KRVVYTAIMDLGATVCTRSKPKCL---VCPIDNCAARRAGTAELVPKMK--- 225  
c 000003378864 2 152 VKRVLTRYFALSGWTG---NSKISNELWKL---SSR-YTP-----KRVVYTAIMDLGATVCTRSKPKCL---VCPIDNCAARRAGTAELVPKMK--- 225  
c 000003910742 3 141 VKRVLTRYFALSGWTG---NSKISNELWKL---SSR-YTP-----KRVVYTAIMDLGATVCTRSKPKCL---VCPIDNCAARRAGTAELVPKMK--- 225  
c 000004116181 2 107 VKRVLTRYFALSGWTG---NSKISNELWKL---SSR-YTP-----KRVVYTAIMDLGATVCTRSKPKCL---VCPIDNCAARRAGTAELVPKMK--- 225  
c 000006223903 1 142 VKRVLTRYFALSGWTG---NSKISNELWKL---SSR-YTP-----KRVVYTAIMDLGATVCTRSKPKCL---VCPIDNCAARRAGTAELVPKMK--- 225  
c 000001029068 2 114 VKRVLTRYFALSGWTG---NSKISNELWKL---SSR-YTP-----KRVVYTAIMDLGATVCTRSKPKCL---VCPIDNCAARRAGTAELVPKMK--- 225  
c 000001128125 11 149 VKRVLTRYFALSGWTG---NSKISNELWKL---SSR-YTP-----KRVVYTAIMDLGATVCTRSKPKCL---VCPIDNCAARRAGTAELVPKMK--- 225

c 000001595844 4 240 VFRVLARYTANFIDIG --TPAGKKEFTLL-- ANQ-LLD-- KKQPKGFNAIMDLGALVCKPTNPDGS-- NCPQIKCQAFSQDITIAQLPVKEKK-- 224  
c 000001719155 2 244 VKRVLRSRLFLKENGEE --TRKSENILWET-- MQQ-LLP-- ETGAGNFNAIMDLGATVCLPKNPICL-- LCPLEKRNQAYQKQGVNLYPPKRA-- 228  
c 000002363038 6 246 VKRVLRSRYFALEGWPG --EKRVENQMMGL-- ADN-LTP-- ETDADYTTAIMDLGATLCKRSKPNCN-- LCPVKTCRALTKDQVASFNPSPK-- 233  
105 VKRVLTRFFGVGWGPG --EKQVENLKWHL-- ADE-LTP-- SVRFADYTTAIMDLGATLCKRSKPNCI-- TCPVHSGCALKKGGEGVLDPLKVKR-- 189  
c 000002566035 2 241 VKRVLTRYHGIKGWPG --EKKIENKLWSL-- AEL-YTP-- RGLTKYTTAIMDLGATVCTRRKPCD-- ICPLTLTCTFAREMGQHDFFGPKGP-- 225  
c 000002598045 3 240 VKRVLARHFKIEGNLQ --ASSTTKQLWJL-- SES-LLP-- GDRIDYTTAIMDLGATVCTRSNPICS-- NCPVNSQCSAFKEGLVDPLKVKR-- 225  
c 000004188575 41 241 VKRVLARYFAIASWPG --NKATEQMMQWQ-- ADN-LLP-- DQRIAAVTAQMDLGAITCTRSKPNCD-- CCFPLNSQCAVARGTPTDPTFIAPK-- 225  
c 00000240049 1 240 VKRVLARHQAIEGWSG --QSPVSKRLWTI-- AEQ-FTT-- ENQLADYTTAIMDLGATVCTRSSAKGG-- VCPLESECLAHQQQVADFPKPKP-- 225  
c 000002139456 2 240 VKRVLARYQAVGWSG --QSPVSKRLWTI-- AEQ-FTT-- ENQLADYTTAIMDLGATVCTRSSAKGG-- VCPLESECLAHQQQVADFPKPKP-- 225  
c 000003535614 2 240 VKRVLARYQALGWSG --KPAIEKGLWRI-- AER-YTP-- TEELADYTTAIMDLGATVCTRSAPGG-- SCPLENGCKALANNCVAAFPKPKP-- 225  
c 000002657784 4 240 VKRVLARYKKEGDLIS --KALNITKLWRI-- SES-LTP-- EERVDLYTAIMDLGALVCTKSSPKR-- ICVPSRDCIAPFNKILQVLRPKLT-- 222  
c 000003800129 15 243 VKRVLGRLYNQESY --QKKFWEFL-- SKK-ILD-- KSNFLPQCGIMDYGATCTHINPCD-- ECPLEGRWCLKSGNSFYVYKKK-- 210  
c 000003716781 1 240 VKRVLARHFAVEGVV --TKAEPRREIEGL-- AAA-LVG-- GVNDSGWNALMELGATVCLPKDPRD-- SCVMTCECARARGARVETPLPVR-- 225  
c 000001556689 3 241 VARIMCRALAGIADDTT --RSKVRQRLAEM-- AAD-AIE-- CHPPGTFFNAIMELGARVCTPRSPRD-- CQCPSSCECAHELGIEEQIYPPRKS-- 215  
108 VKRVLARLFLGLKSPGL --SSALRGQARDW-- GED-LHAG-- VSAGLASSDLSIMELGATVCPRPAPLGG-- TCPITSEKCVARATNRVETIPKAKR-- 195  
c 0000044255004 2 246 ARRVYRLRLSLITN --LRANINET-- AEQ-MVS-- HSRPQDFNAIMELGATVCLPGKPRCE-- RCPPLAYRCQARSVGAFFQLRLPRTK-- 225  
c 000000605438 3 241 VKRILYRFFFAVKEA --NDKGLWEM-- AED-LYD-- KDNAYITNMDIGSALCTHGNPLCT-- CQPFVSLCQKGEPL-- LYPTKGGK-- 218  
c 000000581237 15 241 VKRILYRFFAMTSC --NDKGLWEM-- SYE-LYD-- RENSIYITNMDIGSALCTHGNPACD-- VCPFEPLCQKGEPL-- LYPEKVKK-- 218  
c 000002529579 2 241 VKRILYRFFFAVKEA --NEKKLWEM-- AYD-LYD-- KENAYITNMDIGSALCTHGNPLCT-- CQPFVSLCQKGEPL-- LYPTKGGK-- 218  
c 000006097838 1 240 VARVLTRLLGIERPSPK --QKQVVEQLWSV-- TAD-LVHADVLTQTSRRNATAFNAIMELGALICTPRNPICL-- DCPLEKGCILARKQKNVRIPLSAKR-- 207  
c 000000583727 6 240 VARVLTRLLGIERPSPK --DKPVTDRLWSV-- ADE-LVHHTVTLQKPRQNASAFNAIMELGALVCTPRNPICG-- DCPLEKGCILARKQKNVRIPLSAKR-- 233  
c 000005807640 2 240 VARVLTRLLGIERPSPK --ARFVADRILWSV-- ADE-LVNHAVTLRKPQQNASAFNAIMELGALVCTPRNPICG-- DCPLEKGCILARKQKNVRIPLSAKR-- 235  
c 000000134878 1 242 VNRRVSRFLYQDPPS --KNKKMEKFP-- MSI-IIN-- DNRPGDINAMDLGRVYCKPSTPLCD-- ECPITNGCKALKLIGQSDPLPIKIK-- 206  
c 000000536725 3 241 VNRRVSRFLYQDPPS --KNKKMEKFP-- MSI-IIN-- DNRPGDINAMDLGRVYCKPSTPLCD-- ECPITNGCKALKLIGQSDPLPIKIK-- 221  
c 000001684786 4 240 VERNVTRKILRLAENPR --QVSTKGRKLEI-- AGG-WMP-- ADKASSFNAIMELGALICSVPSPDCP-- SCVPREVCARAEQDGPENFPLPKP-- 221  
c 000002971826 23 240 VERNVTRKILRLAENPR --QVSTKGRKLEI-- AGG-WMP-- ADKASSFNAIMELGALICSVPSPDCP-- SCVPREVCARAEQDGPENFPLPKP-- 221  
c 000002040695 2 240 IARVSRVRLVQPSGKE --ALTPSILRQP-- ISL-FLP-- RGRASDYNAMDELGALICRPNFQCS-- LCPITKTLCKSAHNTVPLPHKTK-- 232  
c 000003263657 32 240 VTRVLSRLYRHEHAT --KGPARKRFPFL-- ADG-LIQ-- KQQAADFNAMDELGATVCLPKPRCT-- VCPVCHRCARFHELSDPGSLPYKP-- 238  
c 000005989041 2 240 IERVITRIFGICTPFP --EAKTIVDCAAK-- LAP-KIT-- KGRGDFYTAIMDLGALVCRPKPLCD-- LCPMKCKILANQRNFVDQPVQKSK-- 236  
c 000002391082 2 249 VTRVLCRLRIEEDPR --RTAIEAELIAA-- GEA-LIA-- RGEAGDFNAIMELGARVCTPRNPICP-- TCPVQWQCAQAEGLDPSALPYKVP-- 233  
c 000003839553 2 246 VTRVLCRLRIEEDPR --RAQIKAEELIAA-- VEA-LIA-- RQAGAGDFNAIMELGARVCTPRPKPLCE-- TCPVGTGCAARAELDDPAALPYKAP-- 240  
c 000003396707 2 246 VTRVLCRLRIEEDPR --KAAVKTELIAA-- GER-LIA-- RGRAGDFNAIMELGARVCTPSPACG-- CQAVVEMDPAALPYKAP-- 230  
c 000002044706 1 229 VTRVLCRLRIEEDPR --TAAVSRLWLQ-- ATD-VLP-- QNRPGDFNAIMDLGATVCKPIAPLCE-- CQPLAGLCVARGAAGNEDFPNAGR-- 213  
c 000006007075 1 240 VERIIRKILNTEKE --ISKENILKE-- KKI-LGM-- SDRSSDYAALMELGALVCKPKNPYCK-- KCPITNCKSAHNTVPLPHKTK-- 223  
c 000002094036 4 240 IERVILKILNTEKE --TKKENLHKQ-- KKV-FQG-- TNRSDYVTAIMELGALICPKPIPHCN-- KCPITNCKSAHNTVPLPHKTK-- 223  
c 000002762689 1 240 IERVILKILNTEKE --TKKENLHKQ-- KKI-FGY-- TNRSDYVTAIMELGALICPKPIPHCN-- KCPITNCKSAHNTVPLPHKTK-- 223  
c 000005516980 2 240 IERVILKILNTEKE --TKKENLHKQ-- KKI-FGY-- TNRSDYVTAIMELGALICPKPIPHCN-- KCPITNCKSAHNTVPLPHKTK-- 223  
c 000003920004 1 240 IERVILKILNTEKE --TKKENLHKQ-- KKI-FGY-- TNRSDYVTAIMELGALICPKPIPHCN-- KCPITNCKSAHNTVPLPHKTK-- 223  
c 000004008511 2 240 IERVILKILNTEKE --TKKENLHKQ-- KKI-FGY-- TNRSDYVTAIMELGALICPKPIPHCN-- KCPITNCKSAHNTVPLPHKTK-- 223  
c 000004481347 1 241 IKRIILARYGLIKLPII --LKNKTTIEDI-- ASK-VYS-- KQSSNLLIAFMDYGSIIIVPRNPICG-- ICITISREANCRANQVILIPKIK-- 232  
c 000003787733 3 241 IKRIILARYGLIKLPII --LKNKTTIEDI-- ASK-VYS-- KQSSNLLIAFMDYGSIIIVPRNPICG-- ICITISREANCRANQVILIPKIK-- 232  
c 000000754657 2 243 VRRVMAKILRIKNTK --RNNRRIRNR-- LTK-WMD-- PERPGDINAMDLANKICRVDHAYCN-- TCPIDRVCMARKMIPESYPTIKNK-- 225  
c 000000990943 3 243 VRRVMAKILRIKNTK --RNNRRIRNR-- LTK-WMD-- PERPGDINAMDLANKICRVDHAYCN-- TCPIDRVCMARKMIPESYPTIKNK-- 225  
c 000004474996 2 242 VRRVMAKILRIKNTK --RNNRRIRNR-- LTK-WMD-- PERPGDINAMDLANKICRVDHAYCN-- TCPIDRVCMARKMIPESYPTIKNK-- 225  
c 000001463500 11 240 VTRVLSRLILRLNPT --YNNRRIRNR-- LTK-WMD-- PERPGDINAMDLANKICRVDHAYCN-- TCPIDRVCMARKMIPESYPTIKNK-- 225  
c 000001286181 5 237 VRRVLSRLILRLNPT --YNNRRIRNR-- LTK-WMD-- PERPGDINAMDLANKICRVDHAYCN-- TCPIDRVCMARKMIPESYPTIKNK-- 225  
c 000001293628 3 243 VTRVLSRLILRLNPT --YNNRRIRNR-- LTK-WMD-- PERPGDINAMDLANKICRVDHAYCN-- TCPIDRVCMARKMIPESYPTIKNK-- 225  
c 000001535696 8 240 VTRVLSRLILRLNPT --YNNRRIRNR-- LTK-WMD-- PERPGDINAMDLANKICRVDHAYCN-- TCPIDRVCMARKMIPESYPTIKNK-- 225  
c 000001614067 2 240 VTRVLSRLILRLNPT --YNNRRIRNR-- LTK-WMD-- PERPGDINAMDLANKICRVDHAYCN-- TCPIDRVCMARKMIPESYPTIKNK-- 225  
c 000001765289 1 240 VTRVLSRLILRLNPT --YNNRRIRNR-- LTK-WMD-- PERPGDINAMDLANKICRVDHAYCN-- TCPIDRVCMARKMIPESYPTIKNK-- 225  
c 000001961666 1 240 VTRVLSRLILRLNPT --YNNRRIRNR-- LTK-WMD-- PERPGDINAMDLANKICRVDHAYCN-- TCPIDRVCMARKMIPESYPTIKNK-- 225  
c 000002018097 4 240 VTRVLSRLILRLNPT --YNNRRIRNR-- LTK-WMD-- PERPGDINAMDLANKICRVDHAYCN-- TCPIDRVCMARKMIPESYPTIKNK-- 225  
c 000002843512 36 240 VTRVLSRLILRLNPT --YNNRRIRNR-- LTK-WMD-- PERPGDINAMDLANKICRVDHAYCN-- TCPIDRVCMARKMIPESYPTIKNK-- 225  
c 000002930199 1 240 VTRVLSRLILRLNPT --YNNRRIRNR-- LTK-WMD-- PERPGDINAMDLANKICRVDHAYCN-- TCPIDRVCMARKMIPESYPTIKNK-- 225  
c 000003033795 2 240 VTRVLSRLILRLNPT --YNNRRIRNR-- LTK-WMD-- PERPGDINAMDLANKICRVDHAYCN-- TCPIDRVCMARKMIPESYPTIKNK-- 225  
c 000003888107 2 240 VTRVLSRLILRLNPT --YNNRRIRNR-- LTK-WMD-- PERPGDINAMDLANKICRVDHAYCN-- TCPIDRVCMARKMIPESYPTIKNK-- 225  
c 000004013286 6 240 VTRVLSRLILRLNPT --YNNRRIRNR-- LTK-WMD-- PERPGDINAMDLANKICRVDHAYCN-- TCPIDRVCMARKMIPESYPTIKNK-- 225  
c 000004852258 1 240 VTRVLSRLILRLNPT --YNNRRIRNR-- LTK-WMD-- PERPGDINAMDLANKICRVDHAYCN-- TCPIDRVCMARKMIPESYPTIKNK-- 225  
c 000005254087 1 240 VTRVLSRLILRLNPT --YNNRRIRNR-- LTK-WMD-- PERPGDINAMDLANKICRVDHAYCN-- TCPIDRVCMARKMIPESYPTIKNK-- 225  
c 000005603677 1 240 VTRVLSRLILRLNPT --YNNRRIRNR-- LTK-WMD-- PERPGDINAMDLANKICRVDHAYCN-- TCPIDRVCMARKMIPESYPTIKNK-- 225  
c 000003283462 3 240 VTRVLSRLILRLNPT --YNNRRIRNR-- LTK-WMD-- PERPGDINAMDLANKICRVDHAYCN-- TCPIDRVCMARKMIPESYPTIKNK-- 225  
c 000002687221 1 240 VTRVLSRLILRLNPT --YNNRRIRNR-- LTK-WMD-- PERPGDINAMDLANKICRVDHAYCN-- TCPIDRVCMARKMIPESYPTIKNK-- 225  
c 000003347358 19 240 VTRVLSRLILRLNPT --YNNRRIRNR-- LTK-WMD-- PERPGDINAMDLANKICRVDHAYCN-- TCPIDRVCMARKMIPESYPTIKNK-- 225  
c 000002701031 2 240 VTRVLSRLILRLNPT --YNNRRIRNR-- LTK-WMD-- PERPGDINAMDLANKICRVDHAYCN-- TCPIDRVCMARKMIPESYPTIKNK-- 225  
c 000000582753 3 240 VTRVLSRLILRLNPT --YNNRRIRNR-- LTK-WMD-- PERPGDINAMDLANKICRVDHAYCN-- TCPIDRVCMARKMIPESYPTIKNK-- 225  
c 000001713769 5 240 VTRVLSRLILRLNPT --YNNRRIRNR-- LTK-WMD-- PERPGDINAMDLANKICRVDHAYCN-- TCPIDRVCMARKMIPESYPTIKNK-- 225  
c 000004369364 1 240 VTRVLSRLILRLNPT --YNNRRIRNR-- LTK-WMD-- PERPGDINAMDLANKICRVDHAYCN-- TCPIDRVCMARKMIPESYPTIKNK-- 225  
c 000006057486 30 240 VTRVLSRLILRLNPT --YNNRRIRNR-- LTK-WMD-- PERPGDINAMDLANKICRVDHAYCN-- TCPIDRVCMARKMIPESYPTIKNK-- 225  
c 000005494072 10 240 VTRVLSRLILRLNPT --YNNRRIRNR-- LTK-WMD-- PERPGDINAMDLANKICRVDHAYCN-- TCPIDRVCMARKMIPESYPTIKNK-- 225  
c 000001742634 3 240 VTRVLSRLILRLNPT --YNNRRIRNR-- LTK-WMD-- PERPGDINAMDLANKICRVDHAYCN-- TCPIDRVCMARKMIPESYPTIKNK-- 225  
c 000002826998 2 240 VTRVLSRLILRLNPT --YNNRRIRNR-- LTK-WMD-- PERPGDINAMDLANKICRVDHAYCN-- TCPIDRVCMARKMIPESYPTIKNK-- 225  
c 000003159439 6 240 VTRVLSRLILRLNPT --YNNRRIRNR-- LTK-WMD-- PERPGDINAMDLANKICRVDHAYCN-- TCPIDRVCMARKMIPESYPTIKNK-- 225  
c 000004887214 1 240 VTRVLSRLILRLNPT --YNNRRIRNR-- LTK-WMD-- PERPGDINAMDLANKICRVDHAYCN-- TCPIDRVCMARKMIPESYPTIKNK-- 225  
c 000005037037 2 240 VTRVLSRLILRLNPT --YNNRRIRNR-- LTK-WMD-- PERPGDINAMDLANKICRVDHAYCN-- TCPIDRVCMARKMIPESYPTIKNK-- 225  
c 000001059964 1 240 VTRVLSRLILRLNPT --YNNRRIRNR-- LTK-WMD-- PERPGDINAMDLANKICRVDHAYCN-- TCPIDRVCMARKMIPESYPTIKNK-- 225  
c 00000498472 1 240 VTRVLSRLILRLNPT --YNNRRIRNR-- LTK-WMD-- PERPGDINAMDLANKICRVDHAYCN-- TCPIDRVCMARKMIPESYPTIKNK-- 225  
c 000004615912 3 240 VTRVLSRLILRLNPT --YNNRRIRNR-- LTK-WMD-- PERPGDINAMDLANKICRVDHAYCN-- TCPIDRVCMARKMIPESYPTIKNK-- 225  
c 000004766858 2 240 VTRVLSRLILRLNPT --YNNRRIRNR-- LTK-WMD-- PERPGDINAMDLANKICRVDHAYCN-- TCPIDRVCMARKMIPESYPTIKNK-- 225  
c 000002747260 18 240 VTRVLSRLILRLNPT --YNNRRIRNR-- LTK-WMD-- PERPGDINAMDLANKICRVDHAYCN-- TCPIDRVCMARKMIPESYPTIKNK-- 225  
c 000005371561 38 240 VTRVLSRLILRLNPT --YNNRRIRNR-- LTK-WMD-- PERPGDINAMDLANKICRVDHAYCN-- TCPIDRVCMARKMIPESYPTIKNK-- 225  
c 00000169465 2 240 VTRVLSRLILRLNPT --YNNRRIRNR-- LTK-WMD-- PERPGDINAMDLANKICRVDHAYCN-- TCPIDRVCMARKMIPESYPTIKNK-- 225  
c 000003254110 11 240 VTRVLSRLILRLNPT --YNNRRIRNR-- LTK-WMD-- PERPGDINAMDLANKICRVDHAYCN-- TCPIDRVCMARKMIPESYPTIKNK-- 225  
c 000004750284 20 240 VTRVLSRLILRLNPT --YNNRRIRNR-- LTK-WMD-- PERPGDINAMDLANKICRVDHAYCN-- TCPIDRVCMARKMIPESYPTIKNK-- 225  
c 000000141782 15 240 VTRVLSRLILRLNPT --YNNRRIRNR-- LTK-WMD-- PERPGDINAMDLANKICRVDHAYCN-- TCPIDRVCMARKMIPESYPTIKNK-- 225  
c 000002717847 8 240 VTRVLSRLILRLNPT --YNNRRIRNR-- LTK-WMD-- PERPGDINAMDLANKICRVDHAYCN-- TCPIDRVCMARKMIPESYPTIKNK-- 225  
c 000004405479 1 240 VTRVLSRLILRLNPT --YNNRRIRNR-- LTK-WMD-- PERPGDINAMDLANKICRVDHAYCN-- TCPIDRVCMARKMIPESYPTIKNK-- 225  
c 000006126673 1 240 VTRVLSRLILRLNPT --YNNRRIRNR-- LTK-WMD-- PERPGDINAMDLANKICRVDHAYCN-- TCPIDRVCMARKMIPESYPTIKNK-- 225  
c 000000339186 3 240 VTRVLSRLILRLNPT --YNNRRIRNR-- LTK-WMD-- PERPGDINAMDLANKICRVDHAYCN-- TCPIDRVCMARKMIPESYPTIKNK-- 225  
c 000003029168 2 240 VTRVLSRLILRLNPT --YNNRRIRNR-- LTK-WMD-- PERPGDINAMDLANKICRVDHAYCN-- TCPIDRVCMARKMIPESYPTIKNK-- 225  
c 000001863436 1 240 VTRVLSRLILRLNPT --YNNRRIRNR-- LTK-WMD-- PERPGDINAMDLANKICRVDHAYCN-- TCPIDRVCMARKMIPESYPTIKNK-- 225  
c 000002830137 4 240 VTRVLSRLILRLNPT --YNNRRIRNR-- LTK-WMD-- PERPGDINAMDLANKICRVDHAYCN-- TCPIDRVCMARKMIPESYPTIKNK-- 225  
c 000004612302 3 240 VTRVLSRLILRLNPT --YNNRRIRNR-- LTK-WMD-- PERPGDINAMDLANKICRVDHAYCN-- TCPIDRVCMARKMIPESYPTIKNK-- 225  
c 000001933926 1 240 VTRVLSRLILRLNPT --YNNRRIRNR-- LTK-WMD-- PERPGDINAMDLANKICRVDHAYCN-- TCPIDRVCMARKMIPESYPTIKNK-- 225  
c 000003136344 1 240 VTRVLSRLILRLNPT --YNNRRIRNR-- LTK-WMD-- PERPGDINAMDLANKICRVDHAYCN-- TCPIDRVCMARKMIPESYPTIKNK-- 225  
c 000005849454 9 240 VTRVLSRLILRLNPT --YNNRRIRNR-- LTK-WMD-- PERPGDINAMDLANKICRVDHAYCN-- TCPIDRVCMARKMIPESYPTIKNK-- 225  
c 000001169194 1 240 VTRVLSRLILRLNPT --YNNRRIRNR-- LTK-WMD-- PERPGDINAMDLANKICRVDHAYCN-- TCPIDRVCMARKMIPESYPTIKNK-- 225  
c 000002786947 2 240 VTRVLSRLILRLNPT --YNNRRIRNR-- LTK-WMD-- PERPGDINAMDLANKICRVDHAYCN-- TCPIDRVCMARKMIPESYPTIKNK-- 225  
c 000001279808 52 240 VTRVLSRLILRLNPT --YNNRRIRNR-- LTK-WMD-- PERPGDINAMDLANKICRVDHAYCN-- TCPIDRVCMARKMIPESYPTIKNK-- 225  
c 000000358065 2 240 VTRVLSRLILRLNPT --YNNRRIRNR-- LTK-WMD-- PERPGDINAMDLANKICRVDHAYCN-- TCPIDRVCMARKMIPESYPTIKNK-- 225  
c 000003745941 1 240 VTRVLSRLILRLNPT --YNNRRIRNR-- LTK-WMD-- PERPGDINAMDLANKICRVDHAYCN-- TCPIDRVCMARKMIPESYPTIKNK-- 225  
c 000004187032 4 240 VTRVLSRLILRLNPT --YNNRRIRNR-- LTK-WMD-- PERPGDINAMDLANKICRVDHAYCN-- TCPIDRVCMARKMIPESYPTIKNK-- 225  
c 000006067315 3 240 VTRVLSRLILRLNPT --YNNRRIRNR-- LTK-WMD-- PERPGDINAMDLANKICRVDHAYCN-- TCPIDRVCMARKMIPESYPTIKNK-- 225  
c 000005543774 1 240 VTRVLSRLILRLNPT --YNNRRIRNR-- LTK-WMD-- PERPGDINAMDLANKICRVDHAYCN-- TCPIDRVCMARKMIPESYPTIKNK-- 225  
c 000006211484 1 240 VTRVLSRLILRLNPT --YNNRRIRNR-- LTK-WMD-- PERPGDINAMDLANKICRVDHAYCN-- TCPIDRVCMARKMIPESYPTIKNK-- 225  
c 000002718976 3 240 VTRVLSRLILRLNPT --YNNRRIRNR-- LTK-WMD-- PERPGDINAMDLANKICRVDHAYCN-- TCPIDRVCMARKMIPESYPTIKNK-- 225  
c 000002992548 1 240 VTRVLSRLILRLNPT --YNNRRIRNR-- LTK-WMD-- PERPGDINAMDLANKICRVDHAYCN-- TCPIDRVCMARKMIPESYPTIKNK-- 225  
c 000004656751 1 240 VTRVLSRLILRLNPT --YNNRRIRNR-- LTK-WMD-- PERPGDINAMDLANKICRVDHAYCN-- TCPIDRVCMARKMIPESYPTIKNK-- 225  
c 00000265634 1 240 VTRVLSRLILRLNPT --YNNRRIRNR-- LTK-WMD-- PERPGDINAMDLANKICRVDHAYCN-- TCPIDRVCMARKMIPESYPTIKNK-- 225  
c 000004232403 2 240 VTRVLSRLILRLNPT --YNNRRIRNR-- LTK-WMD-- PERPGDINAMDLANKICRVDHAYCN-- TCPIDRVCMARKMIPESYPTIKNK-- 225  
6u7t.after.N146.pdb 240 VTRVLSRLILRLNPT --YNNRRIRNR-- LTK-WMD-- PERPGDINAMDLANKICRVDHAYCN-- TCPIDRVCMARKMIPESYPTIKNK-- 225  
Consensus\_aa: 1.RVhsRhh.lp.....ppph.h.....s.....hhs.....ppsp@QhM-lGthlC..ppP.C.....CP1...C.t.....hP..... 225

## Conservation:

|                     |     |                   |             |                          |                   |                |                                   |                    |               |     |     |
|---------------------|-----|-------------------|-------------|--------------------------|-------------------|----------------|-----------------------------------|--------------------|---------------|-----|-----|
| sp_P17802 MUTY_ECOL | 226 | --- QTLFE ---     | RTGYF ---   | LLIQ ---                 | HEDEVLLAQRPPS -   | GLWGGLYCFE -   | QFADEESLRQ ---                    | WLAQRQIA ---       | A             | 281 |     |
| sp_P83847 MUTY_GEOS | 232 | --- TAVKQ ---     | VPLAV ---   | AVLAD ---                | DEGRVLLIRKRST -   | GLLANIMEFF -   | SCETDGADG ---                     | KEKLEQ ---         | V             | 294 |     |
| c_000003652391_2    | 233 | --- QPKPT ---     | RYGIV ---   | YLARD ---                | AHGAWLLERRPDK -   | GLLGGMLGWF -   | TSNDNDAPG ---                     | DQPPFA ---         | A             | 286 |     |
| c_000000031207_6    | 234 | --- RTEEQ ---     | QWMAA ---   | AVVW ---                 | CGDQVVLWIGDG -    | ELIAGHRGT -    | LARLSGSGGL ---                    | DADKMIG ---        | GA            | 286 |     |
| c_000000430975_4    | 224 | --- RKQQR ---     | RYGVV ---   | YWIER ---                | RDGALISLRQRPEN -  | FIQGGMTET -    | GSLLWASPL ---                     | SRH ---            | A             | 293 |     |
| c_000001007148_4    | 232 | --- RDVID ---     | VFELL ---   | VVMR ---                 | RGRKLLILQHPPD -   | ERWGGWGEFF -   | ALSRDALARS ---                    | RFDERLIE ---       | V             | 297 |     |
| c_000001092848_3    | 244 | --- AAKPS ---     | RKGA --     | FVAVR ---                | ADDAVLLRRRPPD -   | GLLGGMEFF -    | TSGWSAGSD ---                     | SASAFP ---         | A             | 302 |     |
| c_000001151029_1    | 191 | --- TKRKL ---     | RYGVV ---   | YWIER ---                | RDGAVILRQRPEN -   | GIQGGMTET -    | GSLLWAAFL ---                     | SRH ---            | A             | 250 |     |
| c_000001179782_1    | 253 | --- AKGAL ---     | RKGA --     | FVAVR ---                | SGDEAVILRTRPDE -  | GLLGGMALEF -   | GSAWEPVDY ---                     | VAAAL ---          | A             | 312 |     |
| c_000001803646_25   | 236 | --- PVKPT ---     | RYGIA ---   | YIARR ---                | PDGAWLLERRPDK -   | GLLGGMLGWF -   | GAQWQDAV ---                      | DKPPVS ---         | A             | 289 |     |
| c_000002078955_4    | 236 | --- PVKPT ---     | RYGIA ---   | YIARR ---                | PDGAWLLERRPDK -   | GLLGGMLGWF -   | GAQWQDAV ---                      | ENPPVS ---         | A             | 289 |     |
| c_000002106160_4    | 224 | --- QSLFW ---     | QNVLT ---   | GVIV ---                 | KRDSFLIIKRAYG -   | KHLNNIMWLE -   | GGRTLTKNN ---                     | PHPOLLE ---        | V             | 286 |     |
| c_000003607531_2    | 237 | --- VKKAV ---     | RKGVV ---   | FLAAL ---                | SDGSLFLRRRPPD -   | GLLGGMEFF -    | STWLLERSL ---                     | SPK ---            | T             | 296 |     |
| c_000003872363_4    | 232 | --- PAKVI ---     | RYGTA ---   | YIARR ---                | HDGAWLLERRPDK -   | GLLGGMLGWF -   | GSEWGEEAV ---                     | ENPPVS ---         | A             | 285 |     |
| c_000004820107_1    | 241 | --- KPKPK ---     | RKGRV ---   | FWISD ---                | DSGNILFIRRRPEN -  | EMLGGMLGLE -   | TTEWDIRP ---                      | IKLP ---           | Q             | 291 |     |
| c_000005774797_1    | 223 | --- RSKKK ---     | WNAFA ---   | YVIYN ---                | ADGNIGFVRDDK -    | ALLGGWALEF -   | TSDWSTSPV ---                     | FQP ---            | P             | 275 |     |
| c_000005867021_3    | 236 | --- PVKPT ---     | RYGIA ---   | YIARR ---                | PDGAWLLERRPDK -   | GLLGGMLGWF -   | GAQWQDAV ---                      | EKPPIV ---         | A             | 289 |     |
| c_000004546210_2    | 229 | --- KKKRT ---     | ESMYF ---   | LMIVF ---                | DGKGLFLEKRRPK -   | GIWGGIWSFF -   | QIQLADDPQI ---                    | WCEQOFTNN ---      | I             | 286 |     |
| c_000004551008_5    | 229 | --- KKKRT ---     | ESTYF ---   | LMIVF ---                | DGKGLFLEKRRPK -   | GIWGGIWSFF -   | QIQLADDPKT ---                    | WCEQOFTNN ---      | I             | 286 |     |
| c_000002511148_4    | 224 | --- KSKPT ---     | KKVVV ---   | LLPQG ---                | PSGEVLLERKRPK -   | GIWGGIWAFT --- | EAKKNELEL ---                     | ELSRKPTNK ---      | I             | 281 |     |
| c_000000577378_2    | 232 | --- KSKPT ---     | KKVVV ---   | LLPQG ---                | PSGEVLLERKRPK -   | GIWGGIWAFT --- | EAKKNELEL ---                     | ELSRKPTNK ---      | I             | 281 |     |
| c_000000598175_2    | 215 | --- KVMPE ---     | KQAIM ---   | VILKN ---                | SKQEVFMQRPVP -    | GIWGGIWSFF -   | QFKRAFABE ---                     | WKSNSYKLI ---      | I             | 292 |     |
| c_000000754627_3    | 232 | --- KAVKE ---     | KSCDW ---   | LIIK ---                 | HNDKVLMEKRPNS -   | GIWGGIWSFF -   | EFNYSLELT ---                     | FLAQQGLK ---       | A             | 286 |     |
| c_000000811118_1    | 223 | --- KEKIE ---     | KKIDW ---   | LIIK ---                 | TGNKVLKRRKPK -    | GIWGGIWSFF -   | EKDFSSKKI ---                     | SKI ---            | L             | 273 |     |
| c_000000896887_2    | 227 | --- ISSKK ---     | IEVSA ---   | GIII ---                 | KMKKVYIQRKVN -    | GLMGIMWLEF -   | GGKREQES ---                      | EIKEELRVN ---      | V             | 289 |     |
| c_000001176522_24   | 248 | --- KVMPE ---     | KKVCW ---   | QVSLI ---                | QGCWVLVQNPAP -    | GLMGIMWLEF -   | EGNR ---                          | FLDGNEMVAT ---     | I             | 261 |     |
| c_000001345127_1    | 202 | --- KIIPT ---     | KEKFT ---   | LIIVT ---                | EARFVALLRRPDK -   | GIWGGIWSFF -   | EFISVQIDIL ---                    | FLDGNEMVAT ---     | I             | 261 |     |
| c_000001515736_6    | 220 | --- IKRSS ---     | ESNWL ---   | LIAVD ---                | ARRKVLQKQPSA -    | GIWAGIWSFF -   | VTEHYAALQS ---                    | YAOAANSQD ---      | GT            | 278 |     |
| c_000001682161_6    | 223 | --- KTIPT ---     | KERWF ---   | LVLIT ---                | KEGNIGLTKRPAP -   | GIWGGIWSFF -   | EFDEVKILLEN ---                   | FLTDNNVKCL ---     | L             | 282 |     |
| c_000001923643_29   | 230 | --- LKRSR ---     | EAWWL ---   | LIAVD ---                | QGGVWLERRPDK -    | GIWAGIWSFF -   | VFNREALEQ ---                     | AAARHWAA ---       | RS            | 288 |     |
| c_000002030994_5    | 224 | --- KEMPE ---     | KHTVM ---   | LIIQN ---                | DQGEVLMQRPVP -    | GIWGGIWSFF -   | QFKTALAE ---                      | WLDTSFGMS ---      | L             | 281 |     |
| c_000002038721_4    | 226 | --- SKQKE ---     | KNNIN ---   | LLIA ---                 | SKDKVLLKRRNPK -   | GIWGGIWSFF -   | EANSIYNEK ---                     | FNIL ---           | L             | 275 |     |
| c_000002523527_15   | 251 | --- AALPE ---     | RSTVM ---   | LIVRH ---                | GRDVLLQRPAP -     | GLMGIMWLEF -   | EMPVDTVPD ---                     | SEAAEESA ---       | P             | 315 |     |
| c_000002608528_2    | 224 | --- KVMPE ---     | KQTMV ---   | LIIQN ---                | KGQEVFMQRPAP -    | GIWGGIWSFF -   | QFDNHNVLV ---                     | WLDNNYVS ---       | F             | 281 |     |
| c_000002961510_2    | 227 | --- VFSKK ---     | IEVSA ---   | GIII ---                 | KMKKVYIQRKVN -    | GLMGIMWLEF -   | GGKREQES ---                      | EIKEELRVN ---      | V             | 289 |     |
| c_000002979152_8    | 232 | --- KDKRI ---     | KQSMV ---   | LYVSN ---                | ENADVLLERRST -    | GIWGGIWSFF -   | EFETNVKAND ---                    | WLVTKTFALE ---     | S             | 289 |     |
| c_000003248015_3    | 247 | --- RKKGR ---     | KQSMV ---   | LYVSN ---                | ENADVLLERRST -    | GIWGGIWSFF -   | EFETNVKAND ---                    | WLVTKTFALE ---     | S             | 289 |     |
| c_000003294679_3    | 229 | --- KTNPL ---     | KTNLM ---   | LFLRF ---                | EDRIYLLERRPDK -   | GIWGGIWSFF -   | EISKDCSVSD ---                    | WYQSRFGAY ---      | P             | 285 |     |
| c_000003333364_1    | 225 | --- KPAVP ---     | VDVAS ---   | GVIV ---                 | HDGYIFIQKRPD -    | GVWPGIWSFF -   | GGTVEKGET ---                     | PAQCVRV ---        | V             | 287 |     |
| c_000003402697_5    | 212 | --- TEKPKRKRH --- | IEVGI ---   | ACTIV ---                | REGKYLQARPKG -    | KSFEGSWEFF -   | GGKREKGEN ---                     | FRECVKR ---        | V             | 287 |     |
| c_000003492925_4    | 212 | --- VVPT ---      | REENT ---   | MLYV ---                 | YNDKLSLTQRTG -    | KFLHGLWGEF -   | NTEMPL ---                        | ETQEEVGD ---       | V             | 252 |     |
| c_000003766664_5    | 229 | --- RPPKK ---     | IALLVAC --- | VIRO ---                 | EQGAVLLTQRPKE -   | GLFGIMWLEF -   | LKEVDETPS ---                     | KAGVGR ---         | V             | 301 |     |
| c_000003948186_72   | 236 | --- NNPTT ---     | RHTVM ---   | LIIEN ---                | TAGEVLLERKPAQ -   | GIWGGIWSFF -   | ELATGQNAIT ---                    | YCEQELQIA ---      | V             | 283 |     |
| c_000005057120_4    | 225 | --- KVLAV ---     | QGLIF ---   | LMLQD ---                | QGVVFLLEKRPAS -   | GIWGGIWSFF -   | EFQSFAEIKS ---                    | WCLEN ---          | D             | 281 |     |
| c_000005590109_5    | 225 | --- KSLPV ---     | KSTIV ---   | LMLQD ---                | QGVVFLLEKRPAS -   | GIWGGIWSFF -   | EFQSFAEIKS ---                    | WCLEN ---          | D             | 281 |     |
| c_000006063368_2    | 224 | --- KKKRT ---     | KHVVH ---   | LITVS ---                | HKGKVLQKRLAK -    | GLMGIMWLEF -   | EKEKEMLEK ---                     | ECKSTFOIK ---      | D             | 281 |     |
| c_000000467631_2    | 204 | --- KTLFV ---     | KNIME ---   | LMLKD ---                | ELGLVLLERKPPS -   | GIWGGIWSFF -   | EFETLSLEIQS ---                   | FQCOQ ---          | N             | 260 |     |
| c_000000788235_1    | 225 | --- KTLFE ---     | KKAVF ---   | LLLIN ---                | INHEIFITIKRPPS -  | GIWGGIWSFF -   | QFDTYLQACQ ---                    | WYEQFSTH ---       | L             | 282 |     |
| c_000001187176_11   | 226 | --- KRIPV ---     | RQCLM ---   | PLIVN ---                | PQGDVILQRRPDS -   | GIWGGIWSFF -   | QLDSREQLDA ---                    | LIVAQ ---          | GW            | 282 |     |
| c_000001660697_64   | 231 | --- KALPE ---     | RAATM ---   | VIALH ---                | GETVTLQRRPQR -    | GIWGGIWSFF -   | LVGMSDDALDAH ---                  | LADATVQAALAYGV --- | V             | 296 |     |
| c_000003378864_2    | 238 | --- KPVFH ---     | HHIGV ---   | GVIVK ---                | DDQVLLQRRPPE -    | GLLGGIWEFF -   | GGKQEPAT ---                      | TEETVREIREELGV --- | V             | 300 |     |
| c_000003910742_3    | 226 | --- KVIPE ---     | KNAVW ---   | LMLIN ---                | NKDEVEFMQRPAP -   | GIWGGIWSFF -   | QFDDYDQACA ---                    | WHNNYFGFP ---      | C             | 283 |     |
| c_000004116181_2    | 226 | --- KQKAT ---     | RTCVF ---   | LILVN ---                | AKQELLQKRPSP -    | GIWGGIWSFF -   | EVEDTIEAII ---                    | WCSKR ---          | K             | 248 |     |
| c_000006223903_1    | 192 | --- RFRFR ---     | REVVW ---   | IMIKD ---                | SRDRVLLERRASS -   | GIWGGIWSFF -   | ECFVEALEP ---                     | WCRMRFGAG ---      | I             | 283 |     |
| c_000001029068_2    | 199 | --- KKKPV ---     | KTTAM ---   | LIFDN ---                | KGQGVYLLKRPAP -   | GIWGGIWSFF -   | ECSATDKAIT ---                    | KTANHHFQ ---       | A             | 256 |     |
| c_000001128125_11   | 234 | --- KDKPV ---     | KRAFF ---   | LLILL ---                | SERQVLLERKPPQ -   | GVWAGIWSFF -   | EFDSLQGTKE ---                    | SIESQGT ---        | I             | 290 |     |
| c_000001595844_4    | 225 | --- IKRKT ---     | RYFYF ---   | FVFER ---                | KGSDDYIKRRTK -    | DIWQSYIEFF --- | NIESKPTLN ---                     | FQEKYPRIK ---      | F             | 287 |     |
| c_000001719155_2    | 229 | --- APSTK ---     | IAVSA ---   | GVIV ---                 | RNNRYITQKRKA -    | GLMGIMWLEF -   | GGKFSGES ---                      | PEQCLHR ---        | I             | 291 |     |
| c_000002363038_6    | 234 | --- KKKPV ---     | KQKWL ---   | LILQN ---                | SAEQVFLYKRPQ -    | GIWAGIWSFF -   | EFDSYDRAVD ---                    | FLNGEIRH ---       | DA            | 292 |     |
| c_000002561400_1    | 190 | --- KKKPV ---     | KQAWF ---   | VQQLN ---                | AKQVILYKRPQ -     | GIWAGIWSFF -   | EFCSVTDAKT ---                    | YLQQTGPG ---       | L             | 246 |     |
| c_000002566035_2    | 226 | --- AVTPE ---     | RDTYF ---   | AIMEN ---                | NNGEILLERQPS -    | GIWGGIWSFF -   | EFSSFLRIE ---                     | MIKRYKGFN ---      | I             | 283 |     |
| c_000002598045_3    | 226 | --- KSKLT ---     | KKVLV ---   | LLPQG ---                | PSGEVLLERKRPK -   | GIWGGIWSFF -   | ETERKAELEL ---                    | ALSRNFDNS ---      | I             | 281 |     |
| c_000004188575_41   | 226 | --- KQSHW ---     | KQSHW ---   | LIIIT ---                | DDRVVLLSKRPK -    | GIWGGIWSFF -   | SFDTHYL ---                       | EKLHNTL ---        | K             | 279 |     |
| c_000000420049_1    | 224 | --- KILPV ---     | REKRL ---   | LIIIRN ---               | KQGHVLLERKPPS -   | GIWGGIWSFF -   | ELTLDKSLAE ---                    | SIERNNWLS ---      | V             | 281 |     |
| c_000002139456_2    | 224 | --- KILPV ---     | REKRL ---   | LIIIRN ---               | KQGHVLLERKPPS -   | GIWGGIWSFF -   | ELTLDKSLAE ---                    | SIERNNWLS ---      | V             | 281 |     |
| c_00000353614_2     | 226 | --- KILPI ---     | QOKRL ---   | LIIIRN ---               | EQGAVYLLERKPP -   | GIWGGIWSFF -   | ELALEAPIIT ---                    | EVKNTWQII ---      | V             | 283 |     |
| c_000002657784_4    | 223 | --- KKKPF ---     | KTFVW ---   | LIVMN ---                | KMGKVLKRRNPL -    | GVWKGIMWLEF -  | ESENIDQLGK ---                    | ECLTMFEKR ---      | K             | 280 |     |
| c_000003800129_15   | 211 | --- TPKIK ---     | VFLNY ---   | EIYK ---                 | RDGCTVIMKRMPL -   | GVWNEIWMPE --- | YKIVE ---                         | ECLTMFEKR ---      | K             | 280 |     |
| c_000003716781_1    | 216 | --- TPTID ---     | VELEM ---   | FLVH ---                 | DHGRVLLERRDEG -   | GVWAGIWELE --- | TREVAALRLIF ---                   | PAELELEL ---       | ---           | 272 |     |
| c_000001556689_3    | 216 | --- LVKA ---      | VTEYA ---   | AVIE ---                 | DNGRLLILFRQRP -   | SIVSDMEFF ---  | TLDRLADTSRSSLTEKPASSHRAEAKLSR --- | YIKEQLGWS ---      | V             | 293 |     |
| c_000001834452_1    | 196 | --- INWKE ---     | HYLLA ---   | GVAS ---                 | CPSGVLLERKPE -    | GVWQGLWGEF --- | SVFYDQKEE ---                     | PDL ---            | AWREFQPKR --- | G   | 253 |
| c_000004255004_2    | 226 | --- TKA ---       | VQWFL ---   | TLAK ---                 | WRSRILLRRRPDK -   | GLASIMWLEF --- | TPENLPAEL ---                     | IDETL ---          | ---           | 274 |     |
| c_000000605438_3    | 219 | --- IKKPI ---     | RKRAL ---   | LIYA ---                 | KNDKYALAQNEE ---  | RLLSGLWGPF --- | QEEDEF ---                        | QEEDEF ---         | I             | 262 |     |
| c_000000581237_15   | 219 | --- IKKPI ---     | RKRTL ---   | LIYH ---                 | KNDKYALAQNEE ---  | RLLSGLWGPF --- | QEEDEF ---                        | QEEDEF ---         | S             | 262 |     |
| c_000002529579_2    | 219 | --- IKKPI ---     | RKRTL ---   | LIYH ---                 | KANDYALAQNEE ---  | RLLSGLWGPF --- | QEEDEF ---                        | QEEDEF ---         | L             | 262 |     |
| c_000006097838_1    | 208 | --- APVSK ---     | RFRFG ---   | FIIA ---                 | WHGNVFMQRPSP -    | EVNAGSWEFF --- | NWLVDDTQ ---                      | LASTKIALG ---      | Q             | 267 |     |
| c_000000583727_6    | 234 | --- AATIN ---     | RRFPG ---   | FLIA ---                 | WHGNVFMQRPSP -    | EVNAGSWEFF --- | NWLVDDTQ ---                      | LASTKIALG ---      | Q             | 267 |     |
| c_000005807640_2    | 207 | --- AATIK ---     | RRFPG ---   | FLIT ---                 | WHGNVFMQRPSP -    | EVNAGSWEFF --- | NWLVDDTQ ---                      | LASTKIALG ---      | Q             | 267 |     |
| c_00000134878_1     | 207 | --- ETKRH ---     | YDVAV ---   | GIIV ---                 | DKKGLLITKRAKE --- | GLLGGIWEFF --- | GGKIKRNEK ---                     | TESAIRK ---        | I             | 269 |     |
| c_000005136725_3    | 222 | --- HTRFH ---     | YDVAV ---   | GIIV ---                 | DKKGLLITKRAKE --- | GLLGGIWEFF --- | GGKIKRNEK ---                     | TESAIRK ---        | I             | 269 |     |
| c_000001684786_4    | 222 | --- RKTIA ---     | VELEA ---   | GIIR ---                 | RGRKLLERNEDL ---  | DYLEGLWGEF --- | LARPS ---                         | GOIAA ---          | I             | 279 |     |
| c_000002971826_23   | 232 | --- RKTVA ---     | VELEA ---   | GIIR ---                 | RGRKLLERNEDL ---  | DYLEGLWGEF --- | LARPS ---                         | GOIAA ---          | I             | 289 |     |
| c_000002040695_2    | 233 | --- TKKPC ---     | RMGHF ---   | FFLVHIPPSSGFPVSLIEKHE -  | PLIEGLWLEF ---    | ---            | TQSWVHKHT ---                     | EAH ---            | ---           | 290 |     |
| c_000003263657_32   | 239 | --- KKKPF ---     | BHDHV ---   | GVIV ---                 | LDKFLIILQRPD -    | GLLGGIWEFF --- | GGRRESSES ---                     | LEHGVTR ---        | ---           | 302 |     |
| c_000005989041_2    | 237 | --- KVKPV ---     | RKGVV ---   | FLAAL ---                | SDGSLFLRRRPPD -   | GLLGGMEFF ---  | STWLLERSL ---                     | SPK ---            | ---           | 296 |     |
| c_000002391082_2    | 234 | --- KKKPV ---     | HYQVA ---   | GVIC ---                 | KGRDILLAQRPAS -   | GLMGIMWLEF --- | GGKQEEGT ---                      | LQCCIQR ---        | ---           | 297 |     |
| c_000003839553_2    | 241 | --- KKKPV ---     | HYQVA ---   | GVIS ---                 | KGRQILLAQRPAP -   | VMLGGIWEFF --- | GGKQEEGT ---                      | LEECILV ---        | ---           | 304 |     |
| c_000003996707_2    | 231 | --- KPTRP ---     | HYEVTA ---  | GVIV ---                 | KGSKLLVLRPSPD -   | GLMGIMWLEF --- | GGKREPES ---                      | LQECILR ---        | ---           | 294 |     |
| c_000002044706_1    | 214 | --- TKVTF ---     | VQVVA ---   | LFLAK ---                | QDGSFLLVRRPAP -   | GLAGIWELE ---  | GRELGDGAPE ---                    | RLASTLIG ---       | ---           | 270 |     |
| c_000006007075_1    | 224 | --- KKKID ---     | KYFLI ---   | KIYK ---                 | KNKKILLIRNTKF -   | NFLKNLRIFF --- | MEETPK ---                        | MEETPK ---         | ---           | 267 |     |
| c_000002094036_4    | 200 | --- KKKIN ---     | KYFLA ---   | TLVK ---                 | NQNKILLIRNTKF -   | NFLKNLRIFF --- | MEETPK ---                        | MEETPK ---         | ---           | 244 |     |
| c_000002762689_1    | 224 | --- KKKNN ---     | KYLLA ---   | KVYK ---                 | DKNKYLLIRNTKF -   | NFLKNLRIFF --- | MEETPK ---                        | MEETPK ---         | ---           | 267 |     |
| c_000005516980_2    | 234 | --- KKKNN ---     | KYFLA ---   | KVYK ---                 | DKNKYLLIRNTKF -   | NFLKNLRIFF --- | MEETPK ---                        | MEETPK ---         | ---           | 267 |     |
| c_000003920004_1    | 233 | --- KKSRR ---     | KYTRAL ---  | IILN ---                 | GSEELIVRRRASK -   | GMLPSMLEV ---  | NNDVMTKK ---                      | LLIVRD ---         | ---           | 292 |     |
| c_000004008511_2    | 227 | --- KSTKR ---     | KYSRAY ---  | IFYN ---                 | EKNEILLIRKRPK -   | GMLASMLEF ---  | NNDVMTKK ---                      | SIVTD ---          | ---           | 286 |     |
| c_000004481347_1    | 234 | --- LEQKK ---     | KPTRAY ---  | ITMN ---                 | KKNELVLRRRASK -   | GMLASMLEF ---  | NNDVMTKK ---                      | DVYKDL ---         | ---           | 293 |     |
| c_000003787733_3    | 226 | --- KILPH ---     | KEIVA ---   | GIIV ---                 | QKQKFLITKRPEN -   | ALLGELWEFF --- | SAEQIFNET ---                     | PIGALRR ---        | ---           | 288 |     |
| c_00000754657_2     | 226 | --- KILPH ---     | KEIVA ---   | GIIV ---                 | QKQKFLITKRPEN -   | ALLGELWEFF --- | SAEQIFNET ---                     | PIGALRR ---        | ---           | 288 |     |
| c_000000909043_3    | 216 | --- KILPH ---     | KIDVT ---   | GIIV ---                 | RGRKLLITKRPEN -   | ALLGELWELE --- | QKREFSNET ---                     | PIGALRR ---        | ---           | 288 |     |
| c_000004474996_2    | 225 | --- KILPH ---     | KEIVA ---   | GMIC ---                 | QKQKFLITKRPEN -   | ALLGELWEFF --- | GWEIVSSET ---                     | PIGALRR ---        | ---           | 287 |     |
| c_000001463500_11   | 213 | --- SIKNI ---     | KHFA ---    | ALIV ---                 | YMKFLIMKRPEN -    | SMLGIMWLEF --- | NTQIDKIS ---                      | DDIQLFN ---        | ---           | 275 |     |
| c_000001286181_5    | 218 | --- VTKTO ---     | ESFHW ---   | FIYQ ---                 | KNNKVMLCNRPD -    | GIWPNLVWFF --- | KRELFTQ ---                       | ---                | ---           | 262 |     |
| c_000001293628_3    | 223 | --- PVKRE ---     | ASYAV ---   | LIVTN ---                | PVGEVLLERRPDK -   | GLLGGIWEFF --- | AVEMEAEERNPWGELR -                | VGDLSHGRCARLE ---  | ---           | 301 |     |
| c_000001535696_8    | 232 | --- TKVRN ---     | RYFNY ---   | ITPIAEADDGSRKTLINQKRGK - | DIWQNLWQFF ---    | ---            | LIEETKREID ---                    | LEEVKE ---         | ---           | 291 |     |
| c_000001614067_2    | 233 | --- KEKEE ---     | RYGLF ---   | FYQLN ---                | KDGAFLVETNKS -    |                |                                   |                    |               |     |     |



c 000004852258 1 202 --- KTIPT --- KTIAA --- ALVN --- HGDNIFITKRLPK - GLLGGLWELF --- NIELVNGEI --- PEDLLKI --- KFADQFGLT --- I 264  
c 000005254087 1 230 --- KRTHYDVVAGIWNQNG --- VSPG --- EGGRFILIAQRLPN - GLLGGLWELF --- GGRQEPDET --- LPQALER --- EIREEMDM --- I 299  
c 000005603677 1 222 --- LKIKK --- RYFFY --- FVWRG --- TNGGYLRKRQEK - DIWQGLYEFY --- MIELDKPLK --- TSELKT --- LWAHWELIE --- L 289  
c 000003283462 3 213 --- KNIPH --- YDVVV --- GMIW --- KEGRFILIKRQENQ - KHLGGLWELF --- GKIKENNER --- SELALIR --- EIKECDFE --- V 275  
c 000002687221 1 227 --- VSRPH --- HNVAV --- GLIW --- KDRRLIKRQENAS - GLLGGLWELF --- GKIRSGES --- GSSCVVR --- KTQELINVL --- V 289  
c 000003347358 19 244 --- VVPT --- REENI --- LVVR --- YDDKLSLTQREK - KFLHGLWGEF --- SVEVPH --- --- --- 284  
c 000002701031 2 222 --- LKIKK --- RYFFY --- LIIN --- ENEKILIKRQEK - GIWGLYQYF --- LIENSVKKE --- RDIENSKS --- WKGLFKHNS --- I 285  
c 00000582753 3 230 --- RKSTN --- RYFFY --- YIIS --- DSNHLYIKRQEK - GIWGLYQYF --- LSENLIAPF --- NEVLQK --- QIFKNSIND --- F 291  
c 000001713769 5 222 --- NAKPI --- IHFNV --- LVIL --- DSDHMLCMRRIKN - GIWGLYQYF --- MIESKELIN --- KTQVLSN --- EIFKSIAPIS --- NSD 287  
c 000004369364 1 226 --- IKKPT --- RYFFY --- LVVR --- EKDLFLIKRQYK - DIWQGLYEFY --- NIEGMEIN --- ESEIREA --- IQKQFNKL --- V 287  
c 000006057486 30 226 --- LKIKK --- RHFNF --- VVI - N --- NNQHTYTHQRKDN - DIWQGLYQYF --- LIESKHEDTN --- KVIKSSIF --- QOFFKANSY --- T 291  
c 000005494072 10 222 --- LKIKK --- RYFFY --- LVVL --- KXKXITLANKRINK - GIWGLYQYF --- LIETVETITIK --- TLVEHEYL --- EKINKKQL --- VD 289  
c 000001742634 3 225 --- IKIKK --- RYFFY --- LILLIT --- KDNKITLKRINK - DIWGLYEFY --- LIETKTEINEN --- KLIVNDFF --- QKILINDTT --- IN 292  
c 000002826998 2 225 --- IKKKT --- RYFFY --- LVLPN --- GKNITVQKRRTK - DIWQGLYEFY --- LIETDKIIS --- QKELMKS --- ELWKEVSDF --- DF 289  
c 000003159439 6 222 --- IKIKK --- RYFFY --- LVLIN --- SGNKIALQRKHK - DIWQGLYEFY --- LIETLTAIDIE --- QLTETEFP --- HQINEDQA --- I 288  
c 000004487214 1 227 --- LKIKK --- RYFFY --- LILKT --- KNEETILVKRQK - GIWGLYEFY --- LIETEKEINYL --- ELIDHSIF --- KMIENNFN --- D 293  
c 000005037037 2 225 --- VKVKE --- RYFFY --- LVLIN --- IDNTTYIEQRQNN - DIWGLYQYF --- MIETQQLIN --- KPKELEK --- LITNKINVR --- F 287  
c 000001509964 1 217 --- KVKKI --- LYRGC --- AVIL --- FQDGLILCKRQNP - GLLEGWELF --- SVELGKGDN --- LRKALQE --- HLLEELGCP --- F 279  
c 000002498472 1 226 --- KKIIP --- IDMAT --- GILI --- HNGMLFTQKRPD - DVWGLWELF --- GGRMELKET --- PEQTVVR --- EFLEETEFP --- V 288  
c 000004615912 3 215 --- IRKKK --- RYFFY --- FISHP --- EGKILLRKRQK - DIWQGLYEFY --- MLETDEELK --- ISRVQKT --- QWQQLFHGNEKVRVL 284  
c 000004766858 2 228 --- PEITR --- IEKLT --- ALVQ --- NGDCWLVRKRP - GMLGGLWELF --- TWELPSNSN --- AAAMLQ --- QLEDYQVA --- A 291  
c 000002747260 18 232 --- KPKPT --- RHGIA --- YLGRR --- ADGAWLLERRPEK - GLLGGLWELF --- GGDWAETAT --- EAPPID --- A 285  
c 000005371561 38 232 --- KPKPT --- RHGIA --- YLGRR --- ADGAWLLERRPEK - GLLGGLWELF --- GSDWAESP --- EASPECP --- G 286  
c 00000169465 2 234 --- KALPE --- KSTYM --- MVAQ --- FNSQVILEQRSP - GLWGLYQYF --- EVSSIEEGIE --- QIAKRGIS --- V 289  
c 000003254110 11 234 --- KALPE --- KATFM --- MVAQ --- FNSQVILEQRSP - GLWGLYQYF --- EVSSIEEGIE --- QIAKRGIS --- V 289  
c 000004750284 20 230 --- RVTFV --- RQTYM --- LIPI --- FGQVILEQRSP - GIWGLYQYF --- EAQSAEIGIS --- LLAQRGIE --- V 285  
c 000001417182 15 235 --- REKFL --- RQTYM --- LILVD --- GGRVILLERPPS - GIWGLYQYF --- ECPFEVDVES --- YCRHELGE --- V 291  
c 000002717847 9 224 --- KKD --- VILEF --- SLVK --- DGQVFLAQTEAL - GFWKLLWELF --- YKIVN --- --- --- 263  
c 000004054739 1 215 --- QKPT --- VKLN --- FILPH --- TKONELMHKKQAS - EYKESLWELF --- DGDVEKIK --- --- --- G 259  
c 000006126673 1 241 --- KARFQ --- RYGVV --- YWISD --- DGNLILHKKRPEK - GLYGLYQYF --- TSSWETDIE --- TVEH --- PIFISEQIK --- P 301  
c 00000339186 3 199 --- IRYED --- KQIDV --- YLIT --- RGRPYLVQRP - GVNAGWELF --- NSDSGNKYS --- AFK --- --- 247  
c 000003029168 2 230 --- VPLQREE --- VGIWVAG --- KPYN --- ADSLIFIVQRP - GTWAGWELF --- HDEQTTDEP --- HMAAAR --- IAEATVGP --- M 298  
c 000001863436 1 246 --- ARQKP --- VVAARTAVTSWGGA --- EGRRFILMVKRPAD - GLLGGLWELF --- TVEAAGDVA --- PTAQAVS --- RLRLARTGSP --- V 315  
c 000002830137 4 230 --- TQTEH --- VVEAA --- LVIR --- RGRSVLLRHRERD - ERWAGLWELF --- RFFDPDATN --- NGHQQLVD --- KSELRTGE --- I 303  
c 000004612302 3 232 --- VRTED --- LYQLL --- LVIR --- RDRRLILQHPEK - ERWAGLWELF --- ALSRTGPLKS --- RIDELQIA --- SEAEWGCDD --- V 297  
c 000001933926 1 217 --- VARET --- RHGVV --- FWATR --- GDCGVLLRRRPEH - GLLGGLWELF --- STEWRECPW --- RIRSAV --- KAAPFA --- A 276  
c 000003136334 1 229 --- KRKPT --- RYATV --- FWLLD --- GRGNVLLRRRREK - GLLGGLWELF --- STDWLENT --- PTKENS --- MFAPAA --- V 288  
c 000005849454 9 234 --- KQWVD --- LEMVT --- LVHR --- VGVKVLQKRTS --- GWSGLYEFY --- SAICESFATANE --- ASSAESTAH --- SLAREHR --- A 299  
c 000001169194 1 234 --- VPARE --- ISFLI --- VILQT --- EEEGVMLVQRP - GLLAGWELF --- EQELAKPLD --- CAATSRD --- RAEILAMSILGA --- EVV 301  
c 000002786947 2 234 --- APARE --- IFFLI --- VILQT --- EEEGVMLVQRP - GLLAGWELF --- EQELAKPLD --- CSTTRD --- RAIGLAMTLGA --- EVV 301  
c 000001279808 52 234 --- KKTITKRRHR --- IEVGI --- ACTW --- REGKYLQVARKP - KSPFGSWELF --- GGRKREKES --- FRGCVKR --- EIEEEVGLN --- V 287  
c 00000358065 2 224 --- KKIIN --- KFYLA --- TLVK --- HDOQVILLKNDPK - KFLKNNLWELF --- MKEISQS --- SAT --- AIMK --- C 268  
c 000003745941 1 218 --- KIKQE --- TIDRA --- WVEQ --- GGRKLLHRANDKS - RRLSGLEL --- TLDVMG --- --- --- 268  
c 000004187032 4 224 --- KKNKE --- KYFIL --- KVIK --- KQKQVILLVNTKP - NPLKNNLWELF --- MEELSKP --- --- --- 267  
c 000006067315 3 224 --- KFNKI --- KYFEA --- NIYQ --- KQKQVILLKNNK - KFLKNNLWELF --- MEELSKP --- --- --- 268  
c 000005543774 1 208 --- IQSKN --- YDIFC --- YLQK --- NKQKIALTKNDL - GFLKNNLWELF --- IKTATSK --- --- --- N 230  
c 000006211484 1 208 --- IQSKN --- YDIFC --- YLQK --- NKQKIALTKNDL - GFLKNNLWELF --- IKTATSK --- --- --- N 252  
c 000002718976 3 227 --- IKSKN --- YDIFC --- YI - N --- TKQKIALTKNNQI - SFLKNNLWELF --- IKTATSK --- --- --- N 272  
c 000002992548 1 226 --- KKEQK --- YNVVC --- YLQK --- KKEKIALTKNNQI - SFLKNNLWELF --- IKTATSK --- --- --- N 273  
c 00000456751 1 222 --- IKKKE --- INIYC --- YLNR --- YKKEIALTKNNQI - SFLKNNLWELF --- IKTATSK --- --- --- K 240  
c 00000265634 1 193 --- TKEKK --- FNVVC --- YLNR --- YKKEIALTKNNQI - SFLKNNLWELF --- IKTATSK --- --- --- R 271  
c 000004232403 2 227 --- KKIPT --- RNILAA --- ALIE --- YGDIYILSKRP - GQGLWELF --- NIELKNGKS --- PEKSLKE --- SINNHGYFT --- I 285  
6u7t.after.N146.pdb 226 --- TAVQ --- VPLAV --- AVIAD --- DEGRVILRKDST - GLIANNWELF --- SCETDGDG --- KEKLEQ --- MVGEQ --- 283  
Consensus\_aa: . . . . . h . . . . . hh . . . . . phh . . . . . shh . . . . . h . . . . . p . . . . . p . . . . .

Conservation: 6  
sp\_P17802 MUTY\_ECOL 282 DNLITQLTAFRITSHF --- LDIVPMMLPV --- SSFTG --- CMDEGNA --- LWYNLAQPPSPVG --- LAAPVERILLQQLR --- TGAAPV --- 350  
sp\_P83847 MUTY\_GEOS 295 ELTPTVIFSFIAFSLV --- WQLTVFPGRL --- VHGG --- PVEEY --- RLAPPEDELKAYA --- FVSHQRVWREYK --- EWASGVRRPD --- 366  
c 000003652391 2 287 DMKTLRGVETITSHF --- LILIRVIAEL --- PDDI --- TPAVG --- FLISKHAFRPSD --- LPTV --- TQFDGDANG --- 338  
c 000000031207 6 287 ELIGHADRFQDAITSHF --- LFTHPLVYKY --- QGE --- IPAGV --- ETIPIIDGDR --- LAPALHRKSIAAAR --- ELLIEVFR --- 352  
c 000000430975 4 287 DWKPHGRVYFSTSHF --- LELIKMTIN --- EVTI --- DEGT --- FWCRRKEVKAQA --- LPSLHKIMTHY --- KA --- 354  
c 000001007148 4 288 EFYQWMEVFGQSHF --- LHLQIVAMW --- RSGSW --- EGQTA --- EWGIDELATRP --- LSVAGRRVATVRE --- RILRHNGAQA --- 370  
c 000001092848 3 303 PWEFC --- GTVITITSHF --- LALSIVYARV --- ADMP --- APAGS --- WWCAPGLLAGEA --- LPTVMKVVAAI --- SCATHARRPTG --- 373  
c 000001151029 1 251 DMKPGQGLVYFSTSHF --- LELKI --- --- --- --- --- --- --- --- 272  
c 000001797282 1 313 RWRKLRLVLRGCTSHF --- LELTVFVARV --- ALATP --- APAGT --- RFTPRSALDDEP --- LPLGLMRKVLAFH --- DPKPEPEKPR --- 385  
c 000001803648 25 290 DWQDPGAEVRSITSHF --- LRLSLRISV --- GNA --- KPTAG --- HFTADADFPEP --- LPTVMKRYARIAR --- TQFDGDANG --- 358  
c 000002078955 4 290 DWQQLVNAEVRITSHF --- LRLSLRVATI --- GNM --- PPATG --- DFLSKNAFDEP --- LPTVMKRYARIAR --- TQFDGDANG --- 355  
c 000002106160 4 287 TIKNKIGELIRVSHF --- ITLSGFHCLR --- INGSK --- PEVNRFP --- RWIRLNEINQYA --- FPKANHLKLNMQ --- E --- 351  
c 000003607531 2 297 QWVLIAGTVNIAITSHF --- LQLQVRVAV --- NQDT --- QISGG --- IWDVDRILDEFA --- LPLNLMKGVAFAS --- KRIQPLRLDC --- 368  
c 000003872363 4 286 DWQRLDAQVRITSHF --- LRLSLRVVA --- KNV --- IPTVG --- MFIPSDKDFD --- LPTVMKRYARIAR --- AAFDGH --- 351  
c 000004820107 1 276 ESEQTNLSVKSITSHF --- LIL --- --- --- --- --- --- --- --- 311  
c 000005774797 1 276 SEWKGIGQIRITSHF --- L --- --- --- --- --- --- --- --- 293  
c 000005867021 3 287 DWHVLGAERITSHF --- LRLMVHVAIV --- NEN --- SPDVG --- KFIADDCDFD --- LPTVMKRYARIAR --- GSFVGD --- 355  
c 000004546210 2 287 LWDVSWEPFKASITSHF --- LYIHPQIRIM --- DGQFM --- NTAYSKT --- QSFSLNQLDLSG --- LSAPVGLVNNLY --- TQFDGDANG --- 351  
c 000004551008 5 287 LWDVSWEPFKASITSHF --- LYIHPQIRIM --- DGQFM --- NTAHTPKT --- QSFSLNQLDLSG --- LSAPVGLVNNLY --- TQFDGDANG --- 351  
c 000002511148 4 282 LNIKLSKRVKASITSHF --- LEAIPYLAKE --- ENSK --- KYKNS --- VWDYKNNVESL --- LAPVKKITINQIT --- KP --- 344  
c 000000577378 2 270 LNIKLSKRVKASITSHF --- LEAIPYLAKE --- GSKN --- KYKNS --- VWDYKNNVESL --- LAPVKKITINQIT --- KP --- 332  
c 00000598175 2 293 QESIALAAEIKITSHF --- LYIQLPLIN --- EPTIE --- LGVMEDNES --- LWYNITTEFNGG --- LAAPVQTLINQIT --- NIEKEIENGIN --- 369  
c 00000754627 3 287 SDLANVAPITVSHF --- LILRNLHLM --- EKALPD --- VWRDQL --- VWPDLQSGITNG --- LAAPVQTLINQIT --- AIV --- 353  
c 000000811118 1 274 PVREDPSFPEHLSKK --- LLSIVKRLTI --- KNRD --- LSLDRQL --- NWVLSDSVWNG --- LKPVKDLKXID --- --- 338  
c 00000089687 2 290 VSLNKVMTIKITSHF --- VLTIVFNCKL --- QKQKI --- RPDGCEQW --- KWSLSLKKYK --- FPAANVKIVKYL --- EK --- 356  
c 000001176522 24 289 --- GEALSAPRITSHF --- LDITPYLWHT --- HSDD --- MPQOAG --- QWPLAQAALQEN --- IPAANVKIVLEVI --- EYEQNR --- 354  
c 000001345122 1 262 EQAVI --- KITIYSHY --- LRMKPM --- --- --- --- --- --- --- --- 281  
c 000001515736 6 279 RSWQDLPGFLVITSHF --- LHLHPLVIV --- DQAYA --- ALVSEADES --- CWADAAMAEGL --- LAPAPKILLDAEL --- A --- 345  
c 000001682161 6 283 DSVELIKQLKITSHF --- LMMNPMVLQI --- ERE --- AIEEV --- SWFELENLNGV --- LPTPIKILLRESF --- A --- 343  
c 000001923643 29 289 ADWTELEPAFLVITSHF --- LHLHPLVIV --- HGSGP --- DAAMADGQS --- CWADARAWADM --- LAPVVKILLDAQF --- AG --- 356  
c 000002030994 5 282 SEADKLSKIKITSHF --- LHIQPLINT --- ETPLK --- MGVMEDHDS --- LWYNITTEFNGG --- LAAPVQTLINQIT --- DIVKGTQNDIN --- 358  
c 000002038721 4 276 EKEKSLPLVNLSHQK --- LSIPTFKYFL --- KNRD --- LPIDRRGF --- VVWNNKESVWNG --- IPKPVKILLNHL --- E --- 340  
c 000002523527 15 316 ARAYLAGELITVITSHF --- LLIRAIRVDL --- DTVAL --- EGDAAS --- RWLSLDDLDMLG --- TPAPVKILLDAQF --- RFLG --- 383  
c 000002608528 2 282 DEAKLSKIKITSHF --- LHIHPLINM --- ETPLK --- IGVMEDHD --- --- --- --- --- 321  
c 000002961510 2 290 ISLNKVMITIKITSHF --- VTLNVFNCEL --- QKQKI --- RPDGCEQW --- KWSLSLKKYK --- FPAANVKIVKYL --- EK --- 356  
c 000002979152 8 290 PSLQAYAEIEEITSHF --- LSAKVLRIEL --- DSDKR --- LGVMEETNA --- LWYNMHKDNPGG --- FPAPIKILLRNL --- L --- 356  
c 000003248034 1 302 KHPKILCKFRASITSHF --- YDVSITYAIL --- EGE --- LPEFP --- CWWPQKILATIP --- LITVTRKALAVLS --- PNSSDRNDEQN --- 372  
c 000003294679 3 286 LKISRWKTLQKRSITSHF --- LKIHLEKAE --- DIAIK --- NIANDSA --- LWYKSDSQTRIG --- LAAPVKKILETQF --- NIQ --- 353  
c 000003333364 1 288 AASETIAVIRIGITSHF --- VTLTAFLKRP --- GEPFEGW --- PEPVLHATGE --- WWSFPAELDRY --- FPAHRRKLDQMS --- DRMKYAMIV --- 366  
c 00000340297 5 288 SVRPHYFELAEITSHF --- LLLIRPHQKI --- QAGEP --- SPOQEQI --- KWSFDDGDID --- FLKTNHRLKDLK --- EMRV --- 356  
c 000003492925 4 253 CASEYIEGFAITSHF --- LKIVKPYVE --- LLAQEN --- LWYKSDSQTRIG --- LAAPVKKILETQF --- NIQ --- 353  
c 000003766664 5 302 RIEQCSVSRVYITSHF --- MDIANVALSV --- KGRFES --- PALSPYTG --- SVTFSKTIQKLA --- ISKVDKILLNLY --- DTQITQ --- 316  
c 000003948186 72 284 DSCTEALAPRITSHF --- LLITPLHIKS --- SQOTT --- HVMEDQOQ --- LWYNMHKPVASV --- LAAPVKKILETQF --- NIQ --- 350  
c 000005057120 4 282 QSVQIEKQRITSHF --- LDYTAIVLKT --- ENRIN --- NVMESNGS --- KWSLSLKKYK --- FPAANVKIVKYL --- EK --- 356  
c 000005590109 5 282 KLIKQLEQRIITSHF --- LDYTGIMVKI --- ENPIN --- IVMEANQS --- VVWYKSTQLKFLG --- LPTPIKILLQNY --- 346  
c 000006063368 2 282 PSLIQIKVKISITSHF --- LEAIPYLAKE --- KEKK --- SIKNT --- VVWDSKNIESLG --- ITPSVKKTIEIR --- VP --- 344  
c 00000647631 2 261 TSKQQLDQRIITSHF --- LDYTPIEVKI --- ENPIN --- NVMEANQS --- VVWYKSTQLKFLG --- LPTPIKILLQNY --- 324  
c 000007788235 1 283 PSATTESHFSITSHF --- LQAQTLITQ --- STPIK --- RVMEGTPS --- LWYNNTTTFMG --- LAPVKKITINQIT --- ED --- 350  
c 000001187176 11 283 AEPEALSPLRITSHF --- LDIPQLVIRV --- DAPDR --- VTESQ --- VVWYKSTQLKFLG --- LPTPIKILLQNY --- 324  
c 000001660697 64 297 SDVEAGALITITSHF --- LHMHLHADI --- TKP --- ATLDLDD --- RWVPLQALNSVG --- LAPVKKILETQF --- NIQ --- 363  
c 000003378864 2 301 EVGPLVITVQRIITSHF --- LTHAYHCLRLG --- TPH --- PKVAVES --- RWVPLQALNSVG --- LAPVKKILETQF --- NIQ --- 375  
c 000003910742 3 284 ENTEKETKLSITSHF --- LHIHALLIRQ --- TTPIK --- RVMEGTPS --- LWYNNTTTFMG --- LAPVKKITINQIT --- ED --- 349  
c 000004116181 2 249 KTSVELPLRITSHF --- LQYTTLVVKT --- DNPLN --- FVMEVDQA --- VVWYKSTQLKFLG --- LAPVKKILETQF --- NIQ --- 332  
c 000006223903 1 284 LFESANVLRISITSHF --- LAITPQPARA --- PKRLT --- RRMQSTGL --- LWYKPEGFP --- --- --- 320  
c 000001029068 2 257 QVRKLLPLINASTSHF --- LTI --- --- --- --- --- --- --- --- 376  
c 000001128125 11 291 ESILVWNYFRTITSHF --- LDYPLVRLD --- EGESVPVFTIG --- KQNNDEKASAEM --- NWIELDRINKGEVGP --- VVWYKSTQLKFLG --- 374

c 000001595844 4  
c 000001719155 2  
c 000002363038 6  
c 000002561400 1  
c 000002566035 2  
c 000002598045 3  
c 000004188575 41  
c 000002400049 1  
c 000002139456 2  
c 000003535614 2  
c 000002657784 4  
c 000003800129 15  
c 000003716781 1  
c 000001556689 3  
c 000001834452 1  
c 000004255004 2  
c 000000605438 3  
c 000000581237 15  
c 000002529579 2  
c 000006097838 1  
c 000000583727 6  
c 000005807640 2  
c 000000134878 1  
c 000005136725 3  
c 000001684786 4  
c 000002971826 23  
c 000002040695 2  
c 000003263657 32  
c 000005989041 2  
c 000002391082 2  
c 000003839553 2  
c 000003396707 2  
c 000002044706 1  
c 000006007075 1  
c 000002094036 4  
c 000002762689 1  
c 000005516980 2  
c 000003920004 1  
c 000004008511 2  
c 000004481347 1  
c 000003787733 3  
c 000000754657 2  
c 000000990943 3  
c 000004474996 2  
c 000001463500 11  
c 000001286181 5  
c 000001293628 3  
c 000001535696 8  
c 000001614067 2  
c 000001765289 1  
c 000001961666 1  
c 000002018097 4  
c 000002843512 36  
c 000002930199 1  
c 000003033795 2  
c 000003888107 2  
c 000004013286 6  
c 000004852258 1  
c 000005254087 1  
c 000005603677 1  
c 000003283462 3  
c 000002687221 1  
c 000003347358 19  
c 000002701031 2  
c 000000582753 3  
c 000001713769 5  
c 000004369364 1  
c 000006057486 30  
c 000005494072 10  
c 000001742634 3  
c 000002826998 2  
c 000003159439 6  
c 000004887214 1  
c 000005037037 2  
c 000001059964 1  
c 000002498472 1  
c 000004615912 3  
c 000004766858 2  
c 000002747260 18  
c 000005371561 38  
c 00000169465 2  
c 000003254110 11  
c 000004750284 20  
c 000000141782 15  
c 000002717847 8  
c 000004405479 1  
c 000006126673 1  
c 000000339186 3  
c 000003029168 2  
c 000001863436 1  
c 000002830137 4  
c 000004612302 3  
c 000001933926 1  
c 000003136334 1  
c 000005849454 9  
c 000001169194 1  
c 000002786947 2  
c 000001279808 52  
c 000003358065 2  
c 000003745941 1  
c 000004187032 4  
c 000006067315 3  
c 000005543774 1  
c 000006211484 1  
c 000002718976 3  
c 000002992548 1  
c 000000456751 1  
c 000002655634 1  
c 000004232403 2  
6u7t. after. N146.pdb  
Consensus\_aa:  
.....hpt.ho+bp...l.hp.h.h.....  
.....h.pph.phs...hs...p+hhp.h.....
