### S5 Fig. Colabfold structure prediction pLDDT scores

pLDDT scores represent the confidence in the prediction calculated by *Colabfold*.

#### *Marinosulfonomonas* MutY Structure Prediction

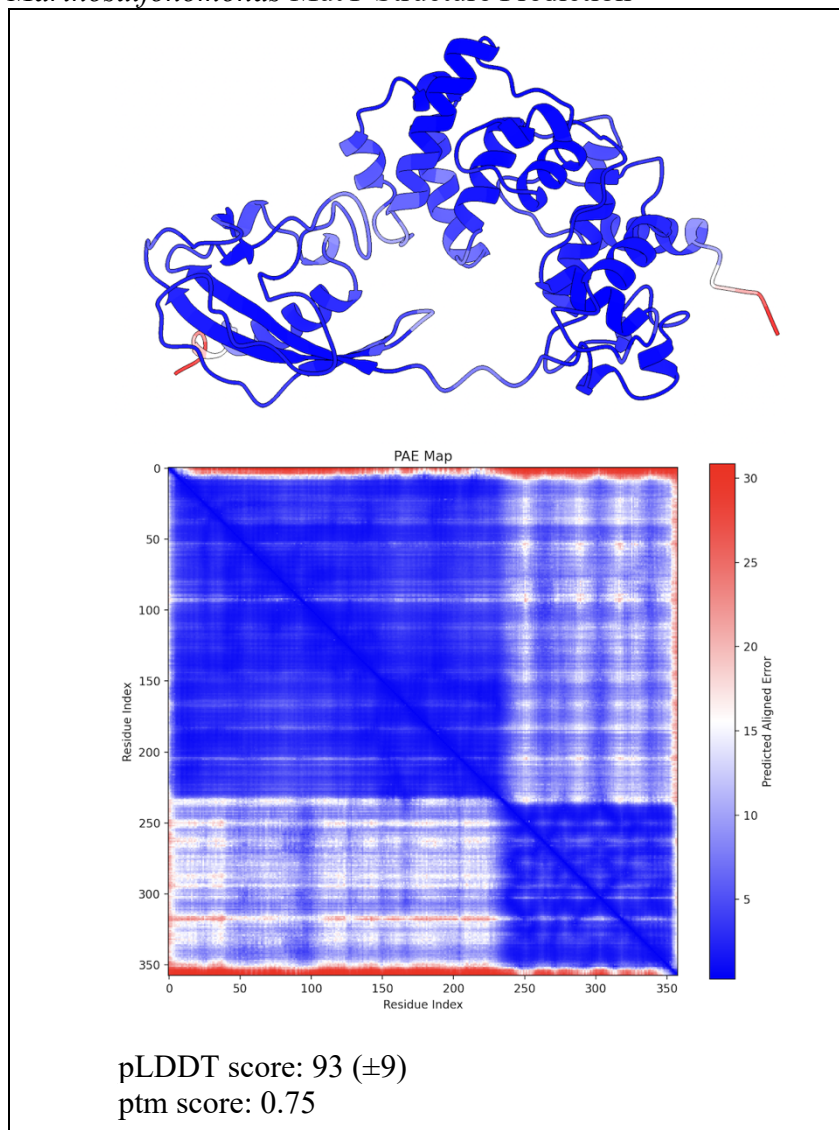

## *Rhodobacteraceae* MutY Structure Prediction

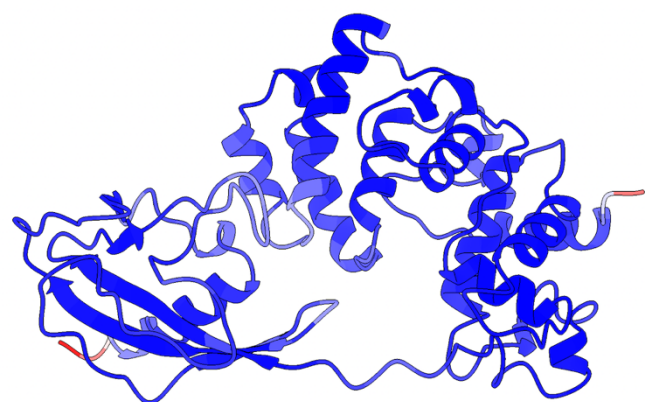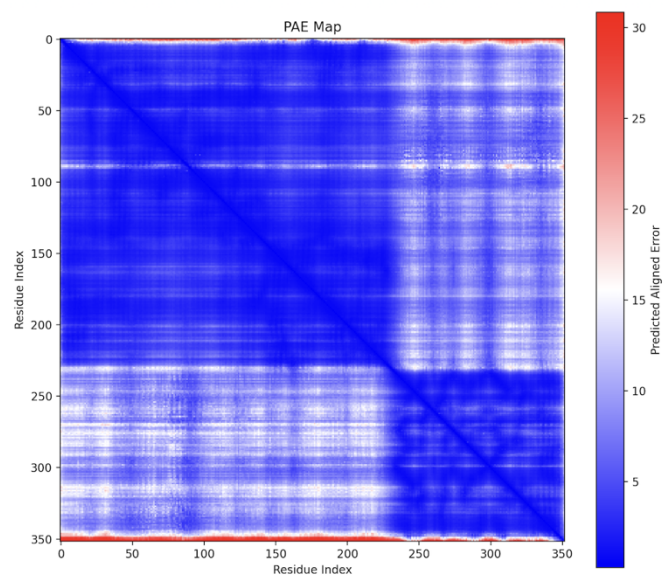

pLDDT score: 94 ( $\pm 6$ )  
ptm score: 0.79

# *Thiotrichaceae* MutY Structure Prediction

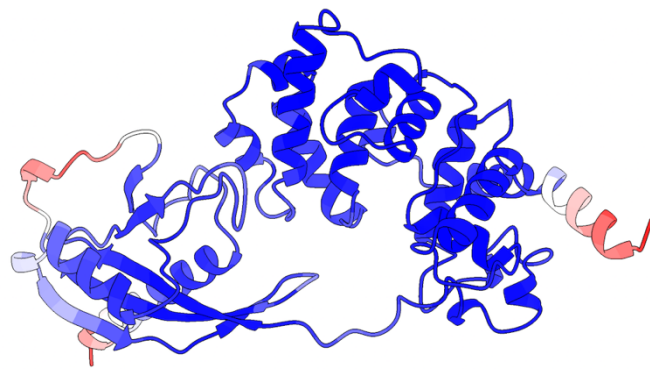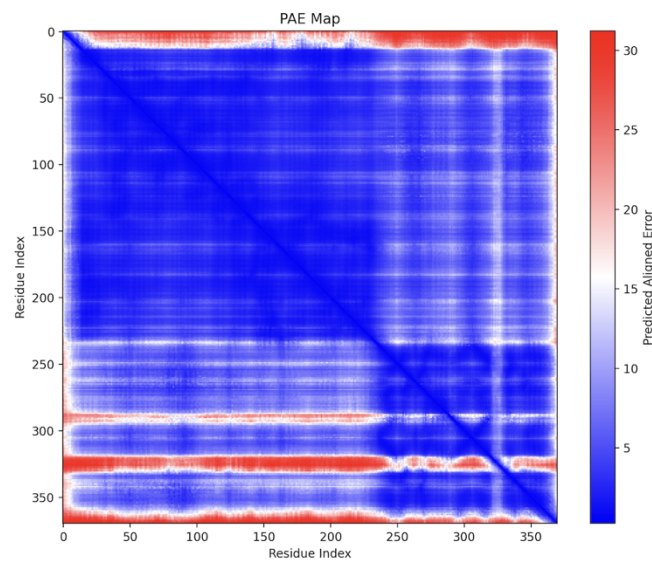

pLDDT score: 92 ( $\pm 12$ )

ptm score: 0.83

# *Flavobacteriaceae* MutY Structure Prediction

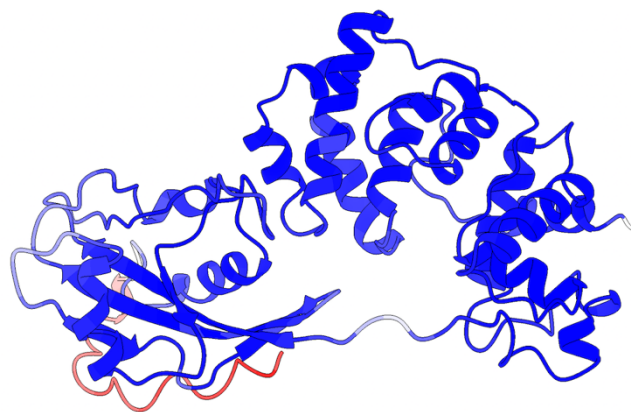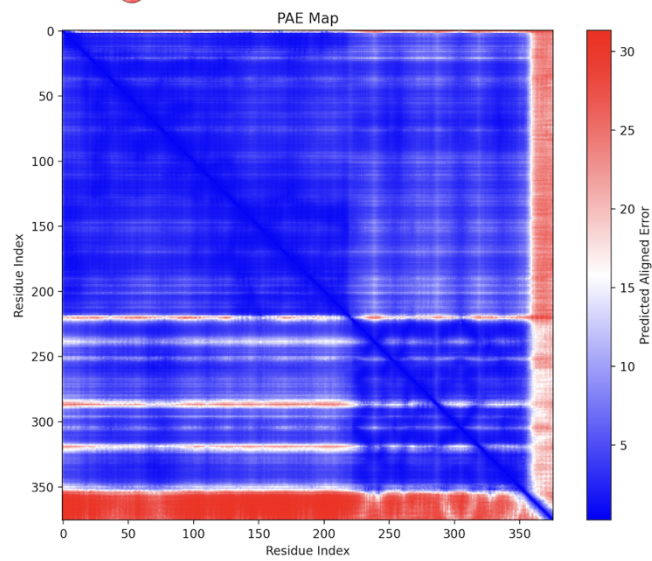

pLDDT score: 92 ( $\pm 14$ )  
ptm score: 0.84
