**S4 Table. Metabolic gene identification.**

| Metabolism                         | Gene              | KEGG id | <i>Marinosulfonomonas</i> <sup>a</sup> |       | <i>Rhodobac-<br/>teraceae</i> | <i>Thiotrich-<br/>aceae</i> | <i>Flavobac-<br/>teriaceae</i> |
|------------------------------------|-------------------|---------|----------------------------------------|-------|-------------------------------|-----------------------------|--------------------------------|
|                                    |                   |         | MAG 1                                  | MAG 2 |                               |                             |                                |
| Cytochrome Oxidases                | UQCRFS1           | K00411  | X                                      | X     | X                             | X                           |                                |
|                                    | coxA              | K02274  |                                        |       | X                             | X                           |                                |
|                                    | ccoN              | K00404  | X                                      | X     | X                             |                             |                                |
|                                    | cydA              | K00425  |                                        | X     |                               |                             |                                |
|                                    | cyoB              | K02298  |                                        |       | X                             |                             |                                |
| Aerobic CODH                       | coxS <sup>b</sup> | K03518  |                                        |       |                               |                             |                                |
|                                    | coxM <sup>b</sup> | K03519  |                                        |       |                               |                             |                                |
|                                    | coxL <sup>b</sup> | K03520  |                                        |       |                               |                             |                                |
| Methanogenesis                     | mcrA <sup>b</sup> | K00399  |                                        |       |                               |                             |                                |
|                                    | mcrB <sup>b</sup> | K00401  |                                        |       |                               |                             |                                |
|                                    | mcrG <sup>b</sup> | K00402  |                                        |       |                               |                             |                                |
| Methane Oxidation or Nitrification | pmoA <sup>b</sup> | K10944  |                                        |       |                               |                             |                                |
|                                    | pmoB <sup>b</sup> | K10945  |                                        |       |                               |                             |                                |
|                                    | pmoC <sup>b</sup> | K10946  |                                        |       |                               |                             |                                |
| Sulfur Oxidation                   | soxA              | K17222  | X                                      | X     | X                             |                             |                                |
|                                    | soxX              | K17223  | X                                      | X     | X                             |                             |                                |
|                                    | soxB              | K17224  | X                                      | X     | X                             |                             |                                |
|                                    | soxC              | K17225  | X                                      | X     | X                             |                             |                                |
|                                    | soxY              | K17226  | X                                      |       | X                             |                             |                                |
|                                    | soxZ              | K17227  | X                                      |       | X                             |                             |                                |
| General Nitrogen Metabolism        | narG              | K00370  | X                                      | X     | X                             |                             |                                |
|                                    | narH              | K00371  | X                                      | X     | X                             |                             |                                |
| Dissimilatory Nitrate Reduction    | nirB              | K00362  |                                        | X     | X                             | X                           |                                |
|                                    | nirD              | K00363  |                                        | X     |                               | X                           |                                |
|                                    | nrfA <sup>b</sup> | K03385  |                                        |       |                               |                             |                                |
| Denitrification                    | nirK              | K00368  |                                        |       | X                             |                             |                                |
|                                    | norB              | K04561  |                                        |       | X                             |                             |                                |
|                                    | norC              | K02305  |                                        |       | X                             |                             |                                |
|                                    | nosZ              | K00376  |                                        |       | X                             |                             |                                |
| MAG Completeness (%) <sup>c</sup>  |                   |         | 88.4                                   | 88.2  | 93.7                          | 66.1                        | 44.3                           |
| MAG Contamination (%) <sup>c</sup> |                   |         | 16.4                                   | 0.6   | 1.4                           | 11.8                        | 1.6                            |

<sup>a</sup> *Marinosulfonomonas* MutY contig belongs to two separate MAGs and each are reported separately as MAG 1 and MAG 2, respectively.

<sup>b</sup> KEGG ID gene not identified in any MAG and not reported in Table 2.

<sup>c</sup> Completeness and contamination scores generated by CheckM v1.0.5 as described in Brazelton et al 2022 [35].

A KEGG ID analysis was used to identify the potential metabolic strategies of the MutY encoding organisms at the LCHF. The full metabolic KEGG ID search is shown above.
