**S9 Table. Rifampicin resistance assay.**

| <b>MutY Expressed</b>                         | <b>Median (ci.low<sup>a</sup>, ci.high<sup>a</sup>)</b> | <b>Mutation Frequency<sup>b</sup> (per 10<sup>8</sup> cells)</b> | <b>Fold Change of EcMutY (ci.low<sup>a</sup>, ci.high<sup>a</sup>)</b> | <b>n</b> |
|-----------------------------------------------|---------------------------------------------------------|------------------------------------------------------------------|------------------------------------------------------------------------|----------|
| <i>null</i>                                   | 101 (81, 145)                                           | 20.26                                                            | 8.78 (6.44, 13.3)                                                      | 90       |
| <i>E. coli</i> MutY                           | 12 (9, 14)                                              | 6.70                                                             | 1.00 (NA, NA)                                                          | 79       |
| <i>Marinosulfonomonus</i> MutY                | 7 (4, 10)                                               | 4.13                                                             | 0.57 (0.27, 0.91)                                                      | 30       |
| <i>Marinosulfonomonus</i> MutY (catalysis-)   | 70 (51, 97)                                             | 30.77                                                            | 6.09 (4.32, 9.30)                                                      | 29       |
| <i>Marinosulfonomonus</i> MutY (recognition-) | 74 (59, 90)                                             | 11.53                                                            | 6.39 (4.69, 8.80)                                                      | 40       |
| <i>Rhodobacteraceae</i> MutY                  | 14 (8, 22)                                              | 3.48                                                             | 1.22 (0.71, 2.00)                                                      | 30       |
| <i>Rhodobacteraceae</i> MutY (catalysis-)     | 61 (50, 80)                                             | 41.37                                                            | 5.26 (4.00, 8.00)                                                      | 38       |
| <i>Rhodobacteraceae</i> MutY (recognition-)   | 70 (50, 82)                                             | 37.65                                                            | 6.09 (4.12, 8.75)                                                      | 30       |
| <i>Thiotrichaceae</i> MutY                    | 54 (42, 63)                                             | 14.77                                                            | 4.70 (3.23, 6.44)                                                      | 47       |
| <i>Thiotrichaceae</i> MutY (catalysis-)       | 98 (50, 157)                                            | 28.89                                                            | 8.48 (4.46, 14.28)                                                     | 48       |
| <i>Thiotrichaceae</i> MutY (recognition-)     | 72 (48, 183)                                            | 10.75                                                            | 6.26 (3.77, 18.00)                                                     | 20       |

<sup>a</sup> Confidence intervals (95%) determined by a bootstrap method, see Materials and Methods for details.

<sup>b</sup> Mutation frequency reported as median number of resistant colonies per 10<sup>8</sup> viable colonies. Fold change was calculated by dividing Rif<sup>R</sup> frequency by the frequency measured for cultures expressing *Ec* MutY.
