**S2 Table. Percent identity matrix.**

|                    | <b>Gs MutY</b> | <b>LCHF MutY 4</b> | <b>LCHF MutY 1</b> | <b>LCHF MutY 2</b> | <b>Ec MutY</b> | <b>LCHF MutY 3</b> |
|--------------------|----------------|--------------------|--------------------|--------------------|----------------|--------------------|
| <b>Gs MutY</b>     | 100            | 37.5               | 31.2               | 31.2               | 38.0           | 33.3               |
| <b>LCHF MutY 4</b> | 37.5           | 100                | 34.4               | 33.4               | 33.3           | 33.7               |
| <b>LCHF MutY 1</b> | 31.2           | 34.4               | 100                | 65.5               | 37.0           | 34.8               |
| <b>LCHF MutY 2</b> | 31.2           | 33.4               | 65.5               | 100                | 39.9           | 34.8               |
| <b>Ec MutY</b>     | 38.0           | 33.3               | 37.0               | 39.9               | 100            | 48.3               |
| <b>LCHF MutY 3</b> | 33.3           | 33.7               | 34.8               | 34.8               | 48.3           | 100                |

We were interested in determining how similar the amino sequences of LCHF MutY representatives were to existing MutY enzymes. We visualized this in the form of a percent identity matrix that was generated by *Clustal Omega* [86].
