**S6 Table. Ligand binding affinity (kcal / mol) \*.**

| <b>Adenosine</b> | <b>Gs MutY (6u7t)</b> | <b>Marinosulfonomonas MutY</b> | <b>Rhodobacteraceae MutY</b> | <b>Thiotrichaceae MutY</b> | <b>Flavobacteriaceae MutY</b> |
|------------------|-----------------------|--------------------------------|------------------------------|----------------------------|-------------------------------|
| Mode 1           | -7.3                  | -6.8                           | -6.8                         | -7.0                       | -7.2                          |
| Mode 2           | -6.9                  | -6.3                           | -6.5                         | -6.9                       | -7.1                          |
| Mode 3           | -6.8                  | -6.2                           | -6.3                         | -6.3                       | -7.0                          |
| Mode 4           | -6.7                  | -6.2                           | -6.3                         | -6.3                       | -6.9                          |
| Mode 5           | -6.7                  | -6.2                           | -6.1                         | -6.3                       | -6.8                          |
| Mode 6           | -6.7                  | -6.0                           | -6.0                         | -6.3                       | -6.6                          |
| Mode 7           | -6.6                  | -5.9                           | -6.0                         | -6.2                       | 6.5                           |
| Mode 8           | -6.5                  | -5.8                           | -6.0                         | -6.2                       | -6.4                          |
| Mode 9           | -6.5                  | -5.7                           | -5.8                         | -6.1                       | -6.3                          |

| <b>OG</b> | <b>Gs MutY (6u7t)</b> | <b>Marinosulfonomonas MutY</b> | <b>Rhodobacteraceae MutY</b> | <b>Thiotrichaceae MutY</b> | <b>Flavobacteriaceae MutY</b> |
|-----------|-----------------------|--------------------------------|------------------------------|----------------------------|-------------------------------|
| Mode 1    | -7.7                  | -7.5                           | -7.7                         | -8.0                       | -8.0                          |
| Mode 2    | -6.9                  | -6.8                           | -7.6                         | -7.5                       | -7.5                          |
| Mode 3    | -6.9                  | -6.8                           | -7.5                         | -7.3                       | -7.4                          |
| Mode 4    | -6.8                  | -6.8                           | -7.3                         | -7.0                       | -7.3                          |
| Mode 5    | -6.7                  | -6.7                           | -7.1                         | -7.0                       | -7.2                          |
| Mode 6    | -6.6                  | -6.7                           | -7.1                         | -6.8                       | -7.2                          |
| Mode 7    | -6.5                  | -6.4                           | -7.1                         | -6.8                       | -7.2                          |
| Mode 8    | -6.5                  | -6.2                           | -7.0                         | -6.6                       | -7.1                          |
| Mode 9    | -6.3                  | -6.2                           | -6.9                         | -6.6                       | -7.0                          |

\* Binding affinities are reported for the binding modes generated by *AutoDock VINA*. Each mode represents a predicted ligand pose, which differs by a combination of position, orientation, and rotamer conformation. The receptor structure was obtained from PDB ID 6u7t for *Gs MutY* and through structure prediction for the LCHF *Marinosulfonomonas MutY*, *Rhodobacteraceae MutY*, *Thiotrichaceae MutY*, and *Flavobacteriaceae MutY*. The binding mode representing the starting complex for molecular dynamics analysis is highlighted.
